# Supplementary material
Source: PubMed Central journal article supplement (PMC9035075)
Supplement: NIHMS1764658-supplement-1.pdf [file NIHMS1764658-supplement-1.pdf]

**Appendix**  
**Change in Gender on Record and Transgender Adults' Mental or Behavioral Health**  
**Yee et al.**

**Appendix Table 1.** Sex-Specific Care Diagnosis and Procedure Codes

| Code system                                                   | Codes                                                                                                                                                                                                                                                                                                                                                                                                                                                                                                                                                                                                                                                                                                                                                                                                                                                                                                                                                                                                                                                                                                                                                                                                                                                                                                                                                                                                                                             |
|---------------------------------------------------------------|---------------------------------------------------------------------------------------------------------------------------------------------------------------------------------------------------------------------------------------------------------------------------------------------------------------------------------------------------------------------------------------------------------------------------------------------------------------------------------------------------------------------------------------------------------------------------------------------------------------------------------------------------------------------------------------------------------------------------------------------------------------------------------------------------------------------------------------------------------------------------------------------------------------------------------------------------------------------------------------------------------------------------------------------------------------------------------------------------------------------------------------------------------------------------------------------------------------------------------------------------------------------------------------------------------------------------------------------------------------------------------------------------------------------------------------------------|
| <b>Female sex-specific care: Hysterectomy</b>                 |                                                                                                                                                                                                                                                                                                                                                                                                                                                                                                                                                                                                                                                                                                                                                                                                                                                                                                                                                                                                                                                                                                                                                                                                                                                                                                                                                                                                                                                   |
| CPT/HCPCS                                                     | 01962, 58150, 58152, 58180, 58200, 58210, 58240, 58260, 58262, 58263, 58267, 58270, 58275, 58280, 58285, 58290, 58291, 58292, 58293, 58294, 58541, 58542, 58543, 58544, 58550, 58552, 58553, 58554, 58570, 58571, 58572, 58573, 58953, 58954, 00944                                                                                                                                                                                                                                                                                                                                                                                                                                                                                                                                                                                                                                                                                                                                                                                                                                                                                                                                                                                                                                                                                                                                                                                               |
| ICD10CM                                                       | N993                                                                                                                                                                                                                                                                                                                                                                                                                                                                                                                                                                                                                                                                                                                                                                                                                                                                                                                                                                                                                                                                                                                                                                                                                                                                                                                                                                                                                                              |
| <b>Female sex-specific care: Ovary/fallopian tube-related</b> |                                                                                                                                                                                                                                                                                                                                                                                                                                                                                                                                                                                                                                                                                                                                                                                                                                                                                                                                                                                                                                                                                                                                                                                                                                                                                                                                                                                                                                                   |
| CPT/HCPCS                                                     | 0003U, 0058T, 0103U, 0132U, 0567T, 0568T, 58150, 58152, 58600, 58605, 58611, 58615, 58660, 58661, 58662, 58670, 58671, 58672, 58673, 58679, 58700, 58720, 58740, 58750, 58752, 58760, 58770, 58800, 58805, 58820, 58822, 58825, 58900, 58920, 58925, 58940, 58943, 58950, 58951, 58952, 58953, 58954, 58956, 58957, 58958, 58960, 74740, 74742, 81500, 81503, 00952                                                                                                                                                                                                                                                                                                                                                                                                                                                                                                                                                                                                                                                                                                                                                                                                                                                                                                                                                                                                                                                                               |
| ICD9CM                                                        | 2564, 6208                                                                                                                                                                                                                                                                                                                                                                                                                                                                                                                                                                                                                                                                                                                                                                                                                                                                                                                                                                                                                                                                                                                                                                                                                                                                                                                                                                                                                                        |
| ICD10CM                                                       | C561, C562, C569, C5700, C5701, C5702, C7960, C7961, C7962, D270, D271, D279, D3910, D3911, D3912, E282, E2839, E288, E289, E8940, E8941, N7001, N7002, N7003, N7011, N7012, N7013, N7091, N7092, N7093, N801, N802, N8300, N8301, N8302, N8310, N8311, N8312, N83201, N83202, N83209, N83291, N83292, N83299, N83311, N83312, N83319, N83321, N83322, N83329, N83331, N83332, N83339, N8340, N8341, N8342, N83511, N83512, N83519, N83521, N83522, N83529, N8353, N838, N839, N981, N9983, O00201, O00202, O00209, O00211, O00212, O00219, O23521, O23522, O23523, O23529, Q5001, Q5002, Q501, Q502, Q5031, Q5032, Q5039, Q504, Q506, S37401A, S37401D, S37401S, S37402A, S37402D, S37402S, S37409A, S37409D, S37409S, S37421A, S37421D, S37421S, S37422A, S37422D, S37422S, S37429A, S37429D, S37429S, S37431A, S37431D, S37431S, S37432A, S37432D, S37432S, S37439A, S37439D, S37439S, S37491A, S37491D, S37491S, S37492A, S37492D, S37492S, S37499A, S37499D, S37499S, S37501A, S37501D, S37501S, S37502A, S37502D, S37502S, S37509A, S37509D, S37509S, S37511A, S37511D, S37511S, S37512A, S37512D, S37512S, S37519A, S37519D, S37519S, S37521A, S37521D, S37521S, S37522A, S37522D, S37522S, S37529A, S37529D, S37529S, S37531A, S37531D, S37531S, S37532A, S37532D, S37532S, S37539A, S37539D, S37539S, S37591A, S37591D, S37591S, S37592A, S37592D, S37592S, S37599A, S37599D, S37599S, Z1273, Z1502, Z4002, Z4003, Z8543, Z90721, Z90722 |
| ICD10PCS                                                      | 0U15075, 0U15076, 0U15079, 0U150J5, 0U150J6, 0U150J9, 0U150K5, 0U150K6, 0U150K9, 0U150Z5, 0U150Z6, 0U150Z9, 0U15475, 0U15476, 0U15479, 0U154J5, 0U154J6, 0U154J9, 0U154K5, 0U154K6, 0U154K9, 0U154Z5, 0U154Z6, 0U154Z9, 0U16075, 0U16076, 0U16079, 0U160J5, 0U160J6, 0U160J9, 0U160K5, 0U160K6, 0U160K9, 0U160Z5, 0U160Z6, 0U160Z9, 0U16475, 0U16476, 0U16479, 0U164J5, 0U164J6, 0U164J9, 0U164K5, 0U164K6, 0U164K9, 0U164Z5, 0U164Z6, 0U164Z9, 0U23X0Z,                                                                                                                                                                                                                                                                                                                                                                                                                                                                                                                                                                                                                                                                                                                                                                                                                                                                                                                                                                                          |

**Appendix**  
**Change in Gender on Record and Transgender Adults' Mental or Behavioral Health**  
**Yee et al.**

---

0U23XYZ, 0U28X0Z, 0U28XYZ, 0U500ZZ, 0U503ZZ, 0U504ZZ, 0U508ZZ,  
0U510ZZ, 0U513ZZ, 0U514ZZ, 0U518ZZ, 0U520ZZ, 0U523ZZ, 0U524ZZ,  
0U528ZZ, 0U550ZZ, 0U553ZZ, 0U554ZZ, 0U557ZZ, 0U558ZZ, 0U560ZZ,  
0U563ZZ, 0U564ZZ, 0U567ZZ, 0U568ZZ, 0U570ZZ, 0U573ZZ, 0U574ZZ,  
0U577ZZ, 0U578ZZ, 0U750DZ, 0U750ZZ, 0U753DZ, 0U753ZZ, 0U754DZ,  
0U754ZZ, 0U757DZ, 0U757ZZ, 0U758DZ, 0U758ZZ, 0U760DZ, 0U760ZZ,  
0U763DZ, 0U763ZZ, 0U764DZ, 0U764ZZ, 0U767DZ, 0U767ZZ, 0U768DZ,  
0U768ZZ, 0U770DZ, 0U770ZZ, 0U773DZ, 0U773ZZ, 0U774DZ, 0U774ZZ,  
0U777DZ, 0U777ZZ, 0U778DZ, 0U778ZZ, 0U800ZZ, 0U803ZZ, 0U804ZZ,  
0U810ZZ, 0U813ZZ, 0U814ZZ, 0U820ZZ, 0U823ZZ, 0U824ZZ, 0U9000Z,  
0U900ZX, 0U900ZZ, 0U9030Z, 0U903ZX, 0U903ZZ, 0U9040Z, 0U904ZX,  
0U904ZZ, 0U9080Z, 0U908ZX, 0U908ZZ, 0U90XZZ, 0U9100Z, 0U910ZX,  
0U910ZZ, 0U9130Z, 0U913ZX, 0U913ZZ, 0U9140Z, 0U914ZX, 0U914ZZ,  
0U9180Z, 0U918ZX, 0U918ZZ, 0U91XZZ, 0U9200Z, 0U920ZX, 0U920ZZ,  
0U9230Z, 0U923ZX, 0U923ZZ, 0U9240Z, 0U924ZX, 0U924ZZ, 0U9280Z,  
0U928ZX, 0U928ZZ, 0U92XZZ, 0U9500Z, 0U950ZX, 0U950ZZ, 0U9530Z,  
0U953ZX, 0U953ZZ, 0U9540Z, 0U954ZX, 0U954ZZ, 0U9570Z, 0U957ZX,  
0U957ZZ, 0U9580Z, 0U958ZX, 0U958ZZ, 0U9600Z, 0U960ZX, 0U960ZZ,  
0U9630Z, 0U963ZX, 0U963ZZ, 0U9640Z, 0U964ZX, 0U964ZZ, 0U9670Z,  
0U967ZX, 0U967ZZ, 0U9680Z, 0U968ZX, 0U968ZZ, 0U9700Z, 0U970ZX,  
0U970ZZ, 0U9730Z, 0U973ZX, 0U973ZZ, 0U9740Z, 0U974ZX, 0U974ZZ,  
0U9770Z, 0U977ZX, 0U977ZZ, 0U9780Z, 0U978ZX, 0U978ZZ, 0UB00ZX,  
0UB00ZZ, 0UB03ZX, 0UB03ZZ, 0UB04ZX, 0UB04ZZ, 0UB07ZX,  
0UB07ZZ, 0UB08ZX, 0UB08ZZ, 0UB10ZX, 0UB10ZZ, 0UB13ZX,  
0UB13ZZ, 0UB14ZX, 0UB14ZZ, 0UB17ZX, 0UB17ZZ, 0UB18ZX,  
0UB18ZZ, 0UB20ZX, 0UB20ZZ, 0UB23ZX, 0UB23ZZ, 0UB24ZX,  
0UB24ZZ, 0UB27ZX, 0UB27ZZ, 0UB28ZX, 0UB28ZZ, 0UB50ZX,  
0UB50ZZ, 0UB53ZX, 0UB53ZZ, 0UB54ZX, 0UB54ZZ, 0UB57ZX,  
0UB57ZZ, 0UB58ZX, 0UB58ZZ, 0UB60ZX, 0UB60ZZ, 0UB63ZX,  
0UB63ZZ, 0UB64ZX, 0UB64ZZ, 0UB67ZX, 0UB67ZZ, 0UB68ZX,  
0UB68ZZ, 0UB70ZX, 0UB70ZZ, 0UB73ZX, 0UB73ZZ, 0UB74ZX,  
0UB74ZZ, 0UB77ZX, 0UB77ZZ, 0UB78ZX, 0UB78ZZ, 0UC00ZZ,  
0UC03ZZ, 0UC04ZZ, 0UC08ZZ, 0UC10ZZ, 0UC13ZZ, 0UC14ZZ,  
0UC18ZZ, 0UC20ZZ, 0UC23ZZ, 0UC24ZZ, 0UC28ZZ, 0UC50ZZ,  
0UC53ZZ, 0UC54ZZ, 0UC57ZZ, 0UC58ZZ, 0UC60ZZ, 0UC63ZZ,  
0UC64ZZ, 0UC67ZZ, 0UC68ZZ, 0UC70ZZ, 0UC73ZZ, 0UC74ZZ,  
0UC77ZZ, 0UC78ZZ, 0UF50ZZ, 0UF53ZZ, 0UF54ZZ, 0UF57ZZ, 0UF58ZZ,  
0UF5XZZ, 0UF60ZZ, 0UF63ZZ, 0UF64ZZ, 0UF67ZZ, 0UF68ZZ, 0UF6XZZ,  
0UF70ZZ, 0UF73ZZ, 0UF74ZZ, 0UF77ZZ, 0UF78ZZ, 0UF7XZZ, 0UH303Z,  
0UH30YZ, 0UH333Z, 0UH33YZ, 0UH343Z, 0UH34YZ, 0UH37YZ,  
0UH38YZ, 0UH803Z, 0UH80YZ, 0UH833Z, 0UH83YZ, 0UH843Z,  
0UH84YZ, 0UH873Z, 0UH87YZ, 0UH883Z, 0UH88YZ, 0UJ30ZZ, 0UJ33ZZ,  
0UJ34ZZ, 0UJ38ZZ, 0UJ3XZZ, 0UJ80ZZ, 0UJ83ZZ, 0UJ84ZZ, 0UJ87ZZ,  
0UJ88ZZ, 0UJ8XZZ, 0UL50CZ, 0UL50DZ, 0UL50ZZ, 0UL53CZ, 0UL53DZ,  
0UL53ZZ, 0UL54CZ, 0UL54DZ, 0UL54ZZ, 0UL57DZ, 0UL57ZZ,  
0UL58DZ, 0UL58ZZ, 0UL60CZ, 0UL60DZ, 0UL60ZZ, 0UL63CZ,

---

**Appendix**  
**Change in Gender on Record and Transgender Adults' Mental or Behavioral Health**  
**Yee et al.**

---

0UL63DZ, 0UL63ZZ, 0UL64CZ, 0UL64DZ, 0UL64ZZ, 0UL67DZ,  
0UL67ZZ, 0UL68DZ, 0UL68ZZ, 0UL70CZ, 0UL70DZ, 0UL70ZZ,  
0UL73CZ, 0UL73DZ, 0UL73ZZ, 0UL74CZ, 0UL74DZ, 0UL74ZZ,  
0UL77DZ, 0UL77ZZ, 0UL78DZ, 0UL78ZZ, 0UM00ZZ, 0UM04ZZ,  
0UM10ZZ, 0UM14ZZ, 0UM20ZZ, 0UM24ZZ, 0UM50ZZ, 0UM54ZZ,  
0UM60ZZ, 0UM64ZZ, 0UM70ZZ, 0UM74ZZ, 0UN00ZZ, 0UN03ZZ,  
0UN04ZZ, 0UN08ZZ, 0UN10ZZ, 0UN13ZZ, 0UN14ZZ, 0UN18ZZ,  
0UN20ZZ, 0UN23ZZ, 0UN24ZZ, 0UN28ZZ, 0UN50ZZ, 0UN53ZZ,  
0UN54ZZ, 0UN57ZZ, 0UN58ZZ, 0UN60ZZ, 0UN63ZZ, 0UN64ZZ,  
0UN67ZZ, 0UN68ZZ, 0UN70ZZ, 0UN73ZZ, 0UN74ZZ, 0UN77ZZ,  
0UN78ZZ, 0UP300Z, 0UP303Z, 0UP30YZ, 0UP330Z, 0UP333Z, 0UP33YZ,  
0UP340Z, 0UP343Z, 0UP34YZ, 0UP37YZ, 0UP38YZ, 0UP3X0Z, 0UP3X3Z,  
0UP800Z, 0UP803Z, 0UP807Z, 0UP80CZ, 0UP80DZ, 0UP80JZ, 0UP80KZ,  
0UP80YZ, 0UP830Z, 0UP833Z, 0UP837Z, 0UP83CZ, 0UP83DZ, 0UP83JZ,  
0UP83KZ, 0UP83YZ, 0UP840Z, 0UP843Z, 0UP847Z, 0UP84CZ, 0UP84DZ,  
0UP84JZ, 0UP84KZ, 0UP84YZ, 0UP870Z, 0UP873Z, 0UP877Z, 0UP87CZ,  
0UP87DZ, 0UP87JZ, 0UP87KZ, 0UP87YZ, 0UP880Z, 0UP883Z, 0UP887Z,  
0UP88CZ, 0UP88DZ, 0UP88JZ, 0UP88KZ, 0UP88YZ, 0UP8X0Z, 0UP8X3Z,  
0UP8XDZ, 0UQ00ZZ, 0UQ03ZZ, 0UQ04ZZ, 0UQ08ZZ, 0UQ10ZZ,  
0UQ13ZZ, 0UQ14ZZ, 0UQ18ZZ, 0UQ20ZZ, 0UQ23ZZ, 0UQ24ZZ,  
0UQ28ZZ, 0UQ50ZZ, 0UQ53ZZ, 0UQ54ZZ, 0UQ57ZZ, 0UQ58ZZ,  
0UQ60ZZ, 0UQ63ZZ, 0UQ64ZZ, 0UQ67ZZ, 0UQ68ZZ, 0UQ70ZZ,  
0UQ73ZZ, 0UQ74ZZ, 0UQ77ZZ, 0UQ78ZZ, 0US00ZZ, 0US04ZZ,  
0US08ZZ, 0US10ZZ, 0US14ZZ, 0US18ZZ, 0US20ZZ, 0US24ZZ, 0US28ZZ,  
0US50ZZ, 0US54ZZ, 0US58ZZ, 0US60ZZ, 0US64ZZ, 0US68ZZ, 0US70ZZ,  
0US74ZZ, 0US78ZZ, 0UT00ZZ, 0UT04ZZ, 0UT07ZZ, 0UT08ZZ, 0UT0FZZ,  
0UT10ZZ, 0UT14ZZ, 0UT17ZZ, 0UT18ZZ, 0UT1FZZ, 0UT20ZZ, 0UT24ZZ,  
0UT27ZZ, 0UT28ZZ, 0UT2FZZ, 0UT50ZZ, 0UT54ZZ, 0UT57ZZ, 0UT58ZZ,  
0UT5FZZ, 0UT60ZZ, 0UT64ZZ, 0UT67ZZ, 0UT68ZZ, 0UT6FZZ, 0UT70ZZ,  
0UT74ZZ, 0UT77ZZ, 0UT78ZZ, 0UT7FZZ, 0UU507Z, 0UU50JZ, 0UU50KZ,  
0UU547Z, 0UU54JZ, 0UU54KZ, 0UU577Z, 0UU57JZ, 0UU57KZ, 0UU587Z,  
0UU58JZ, 0UU58KZ, 0UU607Z, 0UU60JZ, 0UU60KZ, 0UU647Z, 0UU64JZ,  
0UU64KZ, 0UU677Z, 0UU67JZ, 0UU67KZ, 0UU687Z, 0UU68JZ,  
0UU68KZ, 0UU707Z, 0UU70JZ, 0UU70KZ, 0UU747Z, 0UU74JZ,  
0UU74KZ, 0UU777Z, 0UU77JZ, 0UU77KZ, 0UU787Z, 0UU78JZ,  
0UU78KZ, 0UW300Z, 0UW303Z, 0UW30YZ, 0UW330Z, 0UW333Z,  
0UW33YZ, 0UW340Z, 0UW343Z, 0UW34YZ, 0UW37YZ, 0UW38YZ,  
0UW3X0Z, 0UW3X3Z, 0UW800Z, 0UW803Z, 0UW807Z, 0UW80CZ,  
0UW80DZ, 0UW80JZ, 0UW80KZ, 0UW80YZ, 0UW830Z, 0UW833Z,  
0UW837Z, 0UW83CZ, 0UW83DZ, 0UW83JZ, 0UW83KZ, 0UW83YZ,  
0UW840Z, 0UW843Z, 0UW847Z, 0UW84CZ, 0UW84DZ, 0UW84JZ,  
0UW84KZ, 0UW84YZ, 0UW870Z, 0UW873Z, 0UW877Z, 0UW87CZ,  
0UW87DZ, 0UW87JZ, 0UW87KZ, 0UW87YZ, 0UW880Z, 0UW883Z,  
0UW887Z, 0UW88CZ, 0UW88DZ, 0UW88JZ, 0UW88KZ, 0UW88YZ,  
0UW8X0Z, 0UW8X3Z, 0UW8X7Z, 0UW8XCZ, 0UW8XDZ, 0UW8XJZ,  
0UW8XKZ, 0UY00Z0, 0UY00Z1, 0UY00Z2, 0UY10Z0, 0UY10Z1,

---

**Appendix**  
**Change in Gender on Record and Transgender Adults' Mental or Behavioral Health**  
**Yee et al.**

0UY10ZZ, BU000ZZ, BU001ZZ, BU00YZZ, BU010ZZ, BU011ZZ, BU01YZZ, BU020ZZ, BU021ZZ, BU02YZZ, BU080ZZ, BU081ZZ, BU08YZZ, BU100ZZ, BU101ZZ, BU10YZZ, BU10ZZZ, BU110ZZ, BU111ZZ, BU11YZZ, BU11ZZZ, BU120ZZ, BU121ZZ, BU12YZZ, BU12ZZZ, BU180ZZ, BU181ZZ, BU18YZZ, BU18ZZZ, BU33Y0Z, BU33YZZ, BU33ZZZ, BU34Y0Z, BU34YZZ, BU34ZZZ, BU35Y0Z, BU35YZZ, BU35ZZZ, BU3CY0Z, BU3CYZZ, BU3CZZZ, BU40YZZ, BU40ZZZ, BU41YZZ, BU41ZZZ, BU42YZZ, BU42ZZZ, BU43YZZ, BU43ZZZ, BU44YZZ, BU44ZZZ, BU45YZZ, BU45ZZZ, BU4CYZZ, BU4CZZZ, DU000ZZ, DU001ZZ, DU002ZZ, DU003Z0, DU003ZZ, DU004ZZ, DU005ZZ, DU006ZZ, DU1097Z, DU1098Z, DU1099Z, DU109BZ, DU109CZ, DU109YZ, DU10B7Z, DU10B8Z, DU10B9Z, DU10BBZ, DU10BCZ, DU10BYZ, DU20DZZ, DU20HZZ, DU20JZZ, DUY07ZZ, DUY08ZZ, DUY0CZZ, DUY0FZZ

**Female sex-specific care: Endometrium-related**

ICD9CM 6179

ICD10CM C541, D070, N800, N801, N802, N803, N804, N805, N806, N808, N809, N8500, N8501, N8502, O8612, Z1504

ICD10PCS 0U5B0ZZ, 0U5B3ZZ, 0U5B4ZZ, 0U5B7ZZ, 0U5B8ZZ, 0UCB0ZZ, 0UCB3ZZ, 0UCB4ZZ, 0UCB7ZZ, 0UCB8ZZ, 0UDB7ZX, 0UDB7ZZ, 0UDB8ZX, 0UDB8ZZ

**Female sex-specific care: Menstruation-related**

ICD9CM 6254, 6260, 6261, 6262, 6266, 6268, 6264, 6269, 6254, 6253, 6273

ICD10CM E28310, E28319, F3281, G43821, G43829, G43831, G43839, N920, N921, N922, N924, N925, N926, N943, N9489, N949, N950, N951, N952, N958, N959, Z780

**Female sex-specific care: Pregnancy-related**

CPT/HCPCS 0127U, 01960, 01961, 01962, 01963, 01965, 01966, 01967, 01968, 01969, 0500F, 0501F, 0502F, 0503F, 58970, 58974, 58976, 59000, 59001, 59012, 59015, 59020, 59025, 59030, 59050, 59051, 59070, 59072, 59074, 59076, 59100, 59120, 59121, 59130, 59135, 59136, 59140, 59150, 59151, 59160, 59200, 59300, 59320, 59325, 59350, 59400, 59409, 59410, 59412, 59414, 59425, 59426, 59430, 59510, 59514, 59515, 59525, 59610, 59612, 59614, 59618, 59620, 59622, 59812, 59820, 59821, 59830, 59840, 59841, 59850, 59851, 59852, 59855, 59856, 59857, 59866, 59870, 59871, 59897, 59898, 59899, 74710, 74712, 74713, 76801, 76802, 76805, 76810, 76811, 76812, 76813, 76814, 76818, 76819, 76820, 76821, 76825, 76826, 76827, 76828, 76885, 76886, 81507, 81508, 81509, 81510, 81511, 81512, 84163, 84830, 89250, 89251, 89253, 89254, 89255, 89258, 89268, 89272, 89281, 89290, 89291, 89337, 89342, 89346, 89352, 89356, 99460, 99461, 99462, 99463, 99464, 99465

ICD9CM 64681, 64890, 64891, 64892, 64893, 64894, 63592, V220, V270, V241

ICD10CM C58, D392, F530, N35021, N468, N469, N470, N923, N96, N970, N971, N972, N978, N979, N982, N983, O0000, O0001, O00101, O00102, O00109, O00111, O00112, O00119, O00201, O00202, O00209, O00211, O00212, O00219, O0080, O0081, O0090, O0091, O021, O0281, O0289, O029, O030,

**Appendix**  
**Change in Gender on Record and Transgender Adults' Mental or Behavioral Health**  
**Yee et al.**

O031, O032, O0330, O0331, O0332, O0333, O0334, O0335, O0336, O0337, O0338, O0339, O034, O035, O036, O037, O0380, O0381, O0382, O0383, O0384, O0385, O0386, O0387, O0388, O0389, O039, O045, O046, O047, O0480, O0481, O0482, O0483, O0484, O0485, O0486, O0487, O0488, O0489, O070, O071, O072, O0730, O0731, O0732, O0733, O0734, O0735, O0736, O0737, O0738, O0739, O074, O080, O081, O082, O083, O084, O085, O086, O087, O0881, O0882, O0883, O0889, O089, O0900, O0901, O0902, O0903, O0910, O0911, O0912, O0913, O09211, O09212, O09213, O09219, O09291, O09292, O09293, O09299, O0930, O0931, O0932, O0933, O0940, O0941, O0942, O0943, O09511, O09512, O09513, O09519, O09521, O09522, O09523, O09529, O09611, O09612, O09613, O09619, O09621, O09622, O09623, O09629, O0970, O0971, O0972, O0973, O09811, O09812, O09813, O09819, O09821, O09822, O09823, O09829, O09891, O09892, O09893, O09899, O0990, O0991, O0992, O0993, O09A0, O09A1, O09A2, O09A3, O10011, O10012, O10013, O10019, O1002, O1003, O10111, O10112, O10113, O10119, O1012, O1013, O10211, O10212, O10213, O10219, O1022, O1023, O10311, O10312, O10313, O10319, O1032, O1033, O10411, O10412, O10413, O10419, O1042, O1043, O10911, O10912, O10913, O10919, O1092, O1093, O111, O112, O113, O114, O115, O119, O1200, O1201, O1202, O1203, O1204, O1205, O1210, O1211, O1212, O1213, O1214, O1215, O1220, O1221, O1222, O1223, O1224, O1225, O131, O132, O133, O134, O135, O139, O1400, O1402, O1403, O1404, O1405, O1410, O1412, O1413, O1414, O1415, O1420, O1422, O1423, O1424, O1425, O1490, O1492, O1493, O1494, O1495, O1500, O1502, O1503, O151, O152, O161, O162, O163, O164, O165, O169, O200, O208, O209, O210, O211, O212, O218, O219, O2200, O2201, O2202, O2203, O2210, O2211, O2212, O2213, O2220, O2221, O2222, O2223, O2230, O2231, O2232, O2233, O2240, O2241, O2242, O2243, O2250, O2251, O2252, O2253, O228X1, O228X2, O228X3, O228X9, O2290, O2291, O2292, O2293, O2300, O2301, O2302, O2303, O2310, O2311, O2312, O2313, O2320, O2321, O2322, O2323, O2330, O2331, O2332, O2333, O2340, O2341, O2342, O2343, O23511, O23512, O23513, O23519, O23521, O23522, O23523, O23529, O23591, O23592, O23593, O23599, O2390, O2391, O2392, O2393, O24011, O24012, O24013, O24019, O2402, O2403, O24111, O24112, O24113, O24119, O2412, O2413, O24311, O24312, O24313, O24319, O2432, O2433, O24410, O24414, O24415, O24419, O24420, O24424, O24425, O24429, O24430, O24434, O24435, O24439, O24811, O24812, O24813, O24819, O2482, O2483, O24911, O24912, O24913, O24919, O2492, O2493, O2510, O2511, O2512, O2513, O252, O253, O2600, O2601, O2602, O2603, O2610, O2611, O2612, O2613, O2620, O2621, O2622, O2623, O2630, O2631, O2632, O2633, O2640, O2641, O2642, O2643, O2650, O2651, O2652, O2653, O26611, O26612, O26613, O26619, O2662, O2663, O26711, O26712, O26713, O26719, O2672, O2673, O26811, O26812, O26813, O26819, O26821, O26822, O26823, O26829, O26831, O26832, O26833, O26839, O26841, O26842, O26843, O26849, O26851, O26852, O26853, O26859, O2686, O26872, O26873, O26879, O26891, O26892, O26893, O26899, O2690,

**Appendix**  
**Change in Gender on Record and Transgender Adults' Mental or Behavioral Health**  
**Yee et al.**

O2691, O2692, O2693, O280, O281, O282, O283, O284, O285, O288, O289,  
O29011, O29012, O29013, O29019, O29021, O29022, O29023, O29029,  
O29091, O29092, O29093, O29099, O29111, O29112, O29113, O29119,  
O29121, O29122, O29123, O29129, O29191, O29192, O29193, O29199,  
O29211, O29212, O29213, O29219, O29291, O29292, O29293, O29299,  
O293X1, O293X2, O293X3, O293X9, O2940, O2941, O2942, O2943,  
O295X1, O295X2, O295X3, O295X9, O2960, O2961, O2962, O2963,  
O298X1, O298X2, O298X3, O298X9, O2990, O2991, O2992, O2993,  
O30001, O30002, O30003, O30009, O30011, O30012, O30013, O30019,  
O30021, O30022, O30023, O30029, O30031, O30032, O30033, O30039,  
O30041, O30042, O30043, O30049, O30091, O30092, O30093, O30099,  
O30101, O30102, O30103, O30109, O30111, O30112, O30113, O30119,  
O30121, O30122, O30123, O30129, O30131, O30132, O30133, O30139,  
O30191, O30192, O30193, O30199, O30201, O30202, O30203, O30209,  
O30211, O30212, O30213, O30219, O30221, O30222, O30223, O30229,  
O30231, O30232, O30233, O30239, O30291, O30292, O30293, O30299,  
O30801, O30802, O30803, O30809, O30811, O30812, O30813, O30819,  
O30821, O30822, O30823, O30829, O30831, O30832, O30833, O30839,  
O30891, O30892, O30893, O30899, O3090, O3091, O3092, O3093,  
O3100X0, O3100X1, O3100X2, O3100X3, O3100X4, O3100X5, O3100X9,  
O3101X0, O3101X1, O3101X2, O3101X3, O3101X4, O3101X5, O3101X9,  
O3102X0, O3102X1, O3102X2, O3102X3, O3102X4, O3102X5, O3102X9,  
O3103X0, O3103X1, O3103X2, O3103X3, O3103X4, O3103X5, O3103X9,  
O3110X0, O3110X1, O3110X2, O3110X3, O3110X4, O3110X5, O3110X9,  
O3111X0, O3111X1, O3111X2, O3111X3, O3111X4, O3111X5, O3111X9,  
O3112X0, O3112X1, O3112X2, O3112X3, O3112X4, O3112X5, O3112X9,  
O3113X0, O3113X1, O3113X2, O3113X3, O3113X4, O3113X5, O3113X9,  
O3120X0, O3120X1, O3120X2, O3120X3, O3120X4, O3120X5, O3120X9,  
O3121X0, O3121X1, O3121X2, O3121X3, O3121X4, O3121X5, O3121X9,  
O3122X0, O3122X1, O3122X2, O3122X3, O3122X4, O3122X5, O3122X9,  
O3123X0, O3123X1, O3123X2, O3123X3, O3123X4, O3123X5, O3123X9,  
O3130X0, O3130X1, O3130X2, O3130X3, O3130X4, O3130X5, O3130X9,  
O3131X0, O3131X1, O3131X2, O3131X3, O3131X4, O3131X5, O3131X9,  
O3132X0, O3132X1, O3132X2, O3132X3, O3132X4, O3132X5, O3132X9,  
O3133X0, O3133X1, O3133X2, O3133X3, O3133X4, O3133X5, O3133X9,  
O318X10, O318X11, O318X12, O318X13, O318X14, O318X15, O318X19,  
O318X20, O318X21, O318X22, O318X23, O318X24, O318X25, O318X29,  
O318X30, O318X31, O318X32, O318X33, O318X34, O318X35, O318X39,  
O318X90, O318X91, O318X92, O318X93, O318X94, O318X95, O318X99,  
O320XX0, O320XX1, O320XX2, O320XX3, O320XX4, O320XX5,  
O320XX9, O321XX0, O321XX1, O321XX2, O321XX3, O321XX4,  
O321XX5, O321XX9, O322XX0, O322XX1, O322XX2, O322XX3,  
O322XX4, O322XX5, O322XX9, O323XX0, O323XX1, O323XX2,  
O323XX3, O323XX4, O323XX5, O323XX9, O324XX0, O324XX1,  
O324XX2, O324XX3, O324XX4, O324XX5, O324XX9, O326XX0,  
O326XX1, O326XX2, O326XX3, O326XX4, O326XX5, O326XX9,

**Appendix**  
**Change in Gender on Record and Transgender Adults' Mental or Behavioral Health**  
**Yee et al.**

O328XX0, O328XX1, O328XX2, O328XX3, O328XX4, O328XX5,  
O328XX9, O329XX0, O329XX1, O329XX2, O329XX3, O329XX4,  
O329XX5, O329XX9, O330, O331, O332, O333XX0, O333XX1, O333XX2,  
O333XX3, O333XX4, O333XX5, O333XX9, O334XX0, O334XX1,  
O334XX2, O334XX3, O334XX4, O334XX5, O334XX9, O335XX0,  
O335XX1, O335XX2, O335XX3, O335XX4, O335XX5, O335XX9,  
O336XX0, O336XX1, O336XX2, O336XX3, O336XX4, O336XX5,  
O336XX9, O337XX0, O337XX1, O337XX2, O337XX3, O337XX4,  
O337XX5, O337XX9, O338, O339, O3400, O3401, O3402, O3403, O3410,  
O3411, O3412, O3413, O34211, O34212, O34219, O3429, O3430, O3431,  
O3432, O3433, O3440, O3441, O3442, O3443, O34511, O34512, O34513,  
O34519, O34521, O34522, O34523, O34529, O34531, O34532, O34533,  
O34539, O34591, O34592, O34593, O34599, O3460, O3461, O3462, O3463,  
O3470, O3471, O3472, O3473, O3480, O3481, O3482, O3483, O3490,  
O3491, O3492, O3493, O350XX0, O350XX1, O350XX2, O350XX3,  
O350XX4, O350XX5, O350XX9, O351XX0, O351XX1, O351XX2,  
O351XX3, O351XX4, O351XX5, O351XX9, O352XX0, O352XX1,  
O352XX2, O352XX3, O352XX4, O352XX5, O352XX9, O353XX0,  
O353XX1, O353XX2, O353XX3, O353XX4, O353XX5, O353XX9,  
O354XX0, O354XX1, O354XX2, O354XX3, O354XX4, O354XX5,  
O354XX9, O355XX0, O355XX1, O355XX2, O355XX3, O355XX4,  
O355XX5, O355XX9, O356XX0, O356XX1, O356XX2, O356XX3,  
O356XX4, O356XX5, O356XX9, O357XX0, O357XX1, O357XX2,  
O357XX3, O357XX4, O357XX5, O357XX9, O358XX0, O358XX1,  
O358XX2, O358XX3, O358XX4, O358XX5, O358XX9, O359XX0,  
O359XX1, O359XX2, O359XX3, O359XX4, O359XX5, O359XX9,  
O360110, O360111, O360112, O360113, O360114, O360115, O360119,  
O360120, O360121, O360122, O360123, O360124, O360125, O360129,  
O360130, O360131, O360132, O360133, O360134, O360135, O360139,  
O360190, O360191, O360192, O360193, O360194, O360195, O360199,  
O360910, O360911, O360912, O360913, O360914, O360915, O360919,  
O360920, O360921, O360922, O360923, O360924, O360925, O360929,  
O360930, O360931, O360932, O360933, O360934, O360935, O360939,  
O360990, O360991, O360992, O360993, O360994, O360995, O360999,  
O361110, O361111, O361112, O361113, O361114, O361115, O361119,  
O361120, O361121, O361122, O361123, O361124, O361125, O361129,  
O361130, O361131, O361132, O361133, O361134, O361135, O361139,  
O361190, O361191, O361192, O361193, O361194, O361195, O361199,  
O361910, O361911, O361912, O361913, O361914, O361915, O361919,  
O361920, O361921, O361922, O361923, O361924, O361925, O361929,  
O361930, O361931, O361932, O361933, O361934, O361935, O361939,  
O361990, O361991, O361992, O361993, O361994, O361995, O361999,  
O3620X0, O3620X1, O3620X2, O3620X3, O3620X4, O3620X5, O3620X9,  
O3621X0, O3621X1, O3621X2, O3621X3, O3621X4, O3621X5, O3621X9,  
O3622X0, O3622X1, O3622X2, O3622X3, O3622X4, O3622X5, O3622X9,  
O3623X0, O3623X1, O3623X2, O3623X3, O3623X4, O3623X5, O3623X9,

**Appendix**  
**Change in Gender on Record and Transgender Adults' Mental or Behavioral Health**  
**Yee et al.**

O364XX0, O364XX1, O364XX2, O364XX3, O364XX4, O364XX5,  
O364XX9, O365110, O365111, O365112, O365113, O365114, O365115,  
O365119, O365120, O365121, O365122, O365123, O365124, O365125,  
O365129, O365130, O365131, O365132, O365133, O365134, O365135,  
O365139, O365190, O365191, O365192, O365193, O365194, O365195,  
O365199, O365910, O365911, O365912, O365913, O365914, O365915,  
O365919, O365920, O365921, O365922, O365923, O365924, O365925,  
O365929, O365930, O365931, O365932, O365933, O365934, O365935,  
O365939, O365990, O365991, O365992, O365993, O365994, O365995,  
O365999, O3660X0, O3660X1, O3660X2, O3660X3, O3660X4, O3660X5,  
O3660X9, O3661X0, O3661X1, O3661X2, O3661X3, O3661X4, O3661X5,  
O3661X9, O3662X0, O3662X1, O3662X2, O3662X3, O3662X4, O3662X5,  
O3662X9, O3663X0, O3663X1, O3663X2, O3663X3, O3663X4, O3663X5,  
O3663X9, O3670X0, O3670X1, O3670X2, O3670X3, O3670X4, O3670X5,  
O3670X9, O3671X0, O3671X1, O3671X2, O3671X3, O3671X4, O3671X5,  
O3671X9, O3672X0, O3672X1, O3672X2, O3672X3, O3672X4, O3672X5,  
O3672X9, O3673X0, O3673X1, O3673X2, O3673X3, O3673X4, O3673X5,  
O3673X9, O3680X0, O3680X1, O3680X2, O3680X3, O3680X4, O3680X5,  
O3680X9, O368120, O368121, O368122, O368123, O368124, O368125,  
O368129, O368130, O368131, O368132, O368133, O368134, O368135,  
O368139, O368190, O368191, O368192, O368193, O368194, O368195,  
O368199, O368210, O368211, O368212, O368213, O368214, O368215,  
O368219, O368220, O368221, O368222, O368223, O368224, O368225,  
O368229, O368230, O368231, O368232, O368233, O368234, O368235,  
O368239, O368290, O368291, O368292, O368293, O368294, O368295,  
O368299, O368310, O368311, O368312, O368313, O368314, O368315,  
O368319, O368320, O368321, O368322, O368323, O368324, O368325,  
O368329, O368330, O368331, O368332, O368333, O368334, O368335,  
O368339, O368390, O368391, O368392, O368393, O368394, O368395,  
O368399, O368910, O368911, O368912, O368913, O368914, O368915,  
O368919, O368920, O368921, O368922, O368923, O368924, O368925,  
O368929, O368930, O368931, O368932, O368933, O368934, O368935,  
O368939, O368990, O368991, O368992, O368993, O368994, O368995,  
O368999, O3690X0, O3690X1, O3690X2, O3690X3, O3690X4, O3690X5,  
O3690X9, O3691X0, O3691X1, O3691X2, O3691X3, O3691X4, O3691X5,  
O3691X9, O3692X0, O3692X1, O3692X2, O3692X3, O3692X4, O3692X5,  
O3692X9, O3693X0, O3693X1, O3693X2, O3693X3, O3693X4, O3693X5,  
O3693X9, O401XX0, O401XX1, O401XX2, O401XX3, O401XX4,  
O401XX5, O401XX9, O402XX0, O402XX1, O402XX2, O402XX3,  
O402XX4, O402XX5, O402XX9, O403XX0, O403XX1, O403XX2,  
O403XX3, O403XX4, O403XX5, O403XX9, O409XX0, O409XX1,  
O409XX2, O409XX3, O409XX4, O409XX5, O409XX9, O4100X0,  
O4100X1, O4100X2, O4100X3, O4100X4, O4100X5, O4100X9, O4101X0,  
O4101X1, O4101X2, O4101X3, O4101X4, O4101X5, O4101X9, O4102X0,  
O4102X1, O4102X2, O4102X3, O4102X4, O4102X5, O4102X9, O4103X0,  
O4103X1, O4103X2, O4103X3, O4103X4, O4103X5, O4103X9, O411010,



**Appendix**  
**Change in Gender on Record and Transgender Adults' Mental or Behavioral Health**  
**Yee et al.**

O411011, O411012, O411013, O411014, O411015, O411019, O411020,  
O411021, O411022, O411023, O411024, O411025, O411029, O411030,  
O411031, O411032, O411033, O411034, O411035, O411039, O411090,  
O411091, O411092, O411093, O411094, O411095, O411099, O411210,  
O411211, O411212, O411213, O411214, O411215, O411219, O411220,  
O411221, O411222, O411223, O411224, O411225, O411229, O411230,  
O411231, O411232, O411233, O411234, O411235, O411239, O411290,  
O411291, O411292, O411293, O411294, O411295, O411299, O411410,  
O411411, O411412, O411413, O411414, O411415, O411419, O411420,  
O411421, O411422, O411423, O411424, O411425, O411429, O411430,  
O411431, O411432, O411433, O411434, O411435, O411439, O411490,  
O411491, O411492, O411493, O411494, O411495, O411499, O418X10,  
O418X11, O418X12, O418X13, O418X14, O418X15, O418X19, O418X20,  
O418X21, O418X22, O418X23, O418X24, O418X25, O418X29, O418X30,  
O418X31, O418X32, O418X33, O418X34, O418X35, O418X39, O418X90,  
O418X91, O418X92, O418X93, O418X94, O418X95, O418X99, O4190X0,  
O4190X1, O4190X2, O4190X3, O4190X4, O4190X5, O4190X9, O4191X0,  
O4191X1, O4191X2, O4191X3, O4191X4, O4191X5, O4191X9, O4192X0,  
O4192X1, O4192X2, O4192X3, O4192X4, O4192X5, O4192X9, O4193X0,  
O4193X1, O4193X2, O4193X3, O4193X4, O4193X5, O4193X9, O4200,  
O42011, O42012, O42013, O42019, O4202, O4210, O42111, O42112,  
O42113, O42119, O4212, O4290, O42911, O42912, O42913, O42919, O4292,  
O43011, O43012, O43013, O43019, O43021, O43022, O43023, O43029,  
O43101, O43102, O43103, O43109, O43111, O43112, O43113, O43119,  
O43121, O43122, O43123, O43129, O43191, O43192, O43193, O43199,  
O43211, O43212, O43213, O43219, O43221, O43222, O43223, O43229,  
O43231, O43232, O43233, O43239, O43811, O43812, O43813, O43819,  
O43891, O43892, O43893, O43899, O4390, O4391, O4392, O4393, O4400,  
O4401, O4402, O4403, O4410, O4411, O4412, O4413, O4420, O4421,  
O4422, O4423, O4430, O4431, O4432, O4433, O4440, O4441, O4442,  
O4443, O4450, O4451, O4452, O4453, O45001, O45002, O45003, O45009,  
O45011, O45012, O45013, O45019, O45021, O45022, O45023, O45029,  
O45091, O45092, O45093, O45099, O458X1, O458X2, O458X3, O458X9,  
O4590, O4591, O4592, O4593, O46001, O46002, O46003, O46009, O46011,  
O46012, O46013, O46019, O46021, O46022, O46023, O46029, O46091,  
O46092, O46093, O46099, O468X1, O468X2, O468X3, O468X9, O4690,  
O4691, O4692, O4693, O4700, O4702, O4703, O471, O479, O480, O481,  
O6000, O6002, O6003, O6010X0, O6010X1, O6010X2, O6010X3, O6010X4,  
O6010X5, O6010X9, O6012X0, O6012X1, O6012X2, O6012X3, O6012X4,  
O6012X5, O6012X9, O6013X0, O6013X1, O6013X2, O6013X3, O6013X4,  
O6013X5, O6013X9, O6014X0, O6014X1, O6014X2, O6014X3, O6014X4,  
O6014X5, O6014X9, O6020X0, O6020X1, O6020X2, O6020X3, O6020X4,  
O6020X5, O6020X9, O6022X0, O6022X1, O6022X2, O6022X3, O6022X4,  
O6022X5, O6022X9, O6023X0, O6023X1, O6023X2, O6023X3, O6023X4,  
O6023X5, O6023X9, O610, O611, O618, O619, O623, O628, O629, O630,  
O631, O632, O639, O640XX0, O640XX1, O640XX2, O640XX3, O640XX4,

**Appendix**  
**Change in Gender on Record and Transgender Adults' Mental or Behavioral Health**  
**Yee et al.**

O640XX5, O640XX9, O641XX0, O641XX1, O641XX2, O641XX3, O641XX4, O641XX5, O641XX9, O642XX0, O642XX1, O642XX2, O642XX3, O642XX4, O642XX5, O642XX9, O643XX0, O643XX1, O643XX2, O643XX3, O643XX4, O643XX5, O643XX9, O644XX0, O644XX1, O644XX2, O644XX3, O644XX4, O644XX5, O644XX9, O645XX0, O645XX1, O645XX2, O645XX3, O645XX4, O645XX5, O645XX9, O648XX0, O648XX1, O648XX2, O648XX3, O648XX4, O648XX5, O648XX9, O649XX0, O649XX1, O649XX2, O649XX3, O649XX4, O649XX5, O649XX9, O650, O651, O652, O653, O654, O655, O658, O659, O660, O661, O662, O663, O6640, O6641, O666, O668, O669, O670, O678, O679, O68, O690XX0, O690XX1, O690XX2, O690XX3, O690XX4, O690XX5, O690XX9, O691XX0, O691XX1, O691XX2, O691XX3, O691XX4, O691XX5, O691XX9, O692XX0, O692XX1, O692XX2, O692XX3, O692XX4, O692XX5, O692XX9, O693XX0, O693XX1, O693XX2, O693XX3, O693XX4, O693XX5, O693XX9, O694XX0, O694XX1, O694XX2, O694XX3, O694XX4, O694XX5, O694XX9, O695XX0, O695XX1, O695XX2, O695XX3, O695XX4, O695XX5, O695XX9, O6981X0, O6981X1, O6981X2, O6981X3, O6981X4, O6981X5, O6981X9, O6982X0, O6982X1, O6982X2, O6982X3, O6982X4, O6982X5, O6982X9, O6989X0, O6989X1, O6989X2, O6989X3, O6989X4, O6989X5, O6989X9, O699XX0, O699XX1, O699XX2, O699XX3, O699XX4, O699XX5, O699XX9, O700, O701, O7020, O7021, O7022, O7023, O703, O704, O709, O7100, O7102, O7103, O711, O712, O721, O722, O723, O730, O731, O740, O741, O742, O743, O744, O745, O746, O747, O748, O749, O750, O751, O752, O753, O755, O7581, O7582, O7589, O759, O76, O770, O771, O778, O779, O80, O82, O8611, O8612, O8613, O8619, O8620, O8621, O8622, O8629, O864, O870, O871, O872, O873, O874, O878, O879, O88011, O88012, O88013, O88019, O8802, O8803, O88111, O88112, O88113, O88119, O8812, O8813, O88211, O88212, O88213, O88219, O8822, O8823, O88311, O88312, O88313, O88319, O8832, O8833, O88811, O88812, O88813, O88819, O8882, O8883, O8901, O8909, O891, O892, O893, O894, O895, O896, O898, O899, O900, O903, O904, O905, O906, O9081, O9089, O909, O91011, O91012, O91013, O91019, O9102, O9103, O91111, O91112, O91113, O91119, O9112, O9113, O91211, O91212, O91213, O91219, O9122, O9123, O92011, O92012, O92013, O92019, O9202, O9203, O92111, O92112, O92113, O92119, O9212, O9213, O9220, O9229, O925, O9270, O9279, O94, O98011, O98012, O98013, O98019, O9802, O9803, O98111, O98112, O98113, O98119, O9812, O9813, O98211, O98212, O98213, O98219, O9822, O9823, O98311, O98312, O98313, O98319, O9832, O9833, O98411, O98412, O98413, O98419, O9842, O9843, O98511, O98512, O98513, O98519, O9852, O9853, O98611, O98612, O98613, O98619, O9862, O9863, O98711, O98712, O98713, O98719, O9872, O9873, O98811, O98812, O98813, O98819, O9882, O9883, O98911, O98912, O98913, O98919, O9892, O9893, O99011, O99012, O99013, O99019, O9902, O9903, O99111, O99112, O99113, O99119, O9912, O9913, O99210, O99211, O99212, O99213, O99214, O99215, O99280, O99281, O99282, O99283, O99284, O99285, O99310, O99311, O99312,

**Appendix**  
**Change in Gender on Record and Transgender Adults' Mental or Behavioral Health**  
**Yee et al.**

O99313, O99314, O99315, O99320, O99321, O99322, O99323, O99324, O99325, O99330, O99331, O99332, O99333, O99334, O99335, O99340, O99341, O99342, O99343, O99344, O99345, O99350, O99351, O99352, O99353, O99354, O99355, O99411, O99412, O99413, O99419, O9942, O9943, O99511, O99512, O99513, O99519, O9952, O9953, O99611, O99612, O99613, O99619, O9962, O9963, O99711, O99712, O99713, O99719, O9972, O9973, O99810, O99814, O99815, O99820, O99824, O99825, O99830, O99834, O99835, O99840, O99841, O99842, O99843, O99844, O99845, O9989, O9A111, O9A112, O9A113, O9A119, O9A12, O9A13, O9A211, O9A212, O9A213, O9A219, O9A22, O9A23, O9A311, O9A312, O9A313, O9A319, O9A32, O9A33, O9A411, O9A412, O9A413, O9A419, O9A42, O9A43, O9A511, O9A512, O9A513, O9A519, O9A52, O9A53, P546, Q504, Q505, Q516, Z0372, Z0373, Z0374, Z0379, Z1332, Z1441, Z317, Z3181, Z3183, Z331, Z332, Z333, Z3400, Z3401, Z3402, Z3403, Z3480, Z3481, Z3482, Z3483, Z3490, Z3491, Z3492, Z3493, Z360, Z361, Z362, Z363, Z364, Z365, Z3681, Z3682, Z3683, Z3684, Z3685, Z3686, Z3687, Z3688, Z3689, Z368A, Z369, Z370, Z371, Z372, Z373, Z374, Z3750, Z3751, Z3752, Z3753, Z3754, Z3759, Z3760, Z3761, Z3762, Z3763, Z3764, Z3769, Z377, Z379, Z390, Z391, Z392, Z3A00, Z3A01, Z3A08, Z3A09, Z3A10, Z3A11, Z3A12, Z3A13, Z3A14, Z3A15, Z3A16, Z3A17, Z3A18, Z3A19, Z3A20, Z3A21, Z3A22, Z3A23, Z3A24, Z3A25, Z3A26, Z3A27, Z3A28, Z3A29, Z3A30, Z3A31, Z3A32, Z3A33, Z3A34, Z3A35, Z3A36, Z3A37, Z3A38, Z3A39, Z3A40, Z3A41, Z3A42, Z3A49, Z52810, Z52811, Z52812, Z52813, Z52819, Z640, Z641, Z8632, Z8751, Z8759, Z98870

ICD10PCS 102073Z, 10207YZ, 10900Z9, 10900ZA, 10900ZB, 10900ZC, 10900ZD, 10900ZU, 10903Z9, 10903ZA, 10903ZB, 10903ZC, 10903ZD, 10903ZU, 10904Z9, 10904ZA, 10904ZB, 10904ZC, 10904ZD, 10904ZU, 10907Z9, 10907ZA, 10907ZB, 10907ZC, 10907ZD, 10907ZU, 10908Z9, 10908ZA, 10908ZB, 10908ZC, 10908ZD, 10908ZU, 10A00ZZ, 10A03ZZ, 10A04ZZ, 10A07Z6, 10A07ZW, 10A07ZX, 10A07ZZ, 10A08ZZ, 10D00Z0, 10D00Z1, 10D00Z2, 10D07Z3, 10D07Z4, 10D07Z5, 10D07Z6, 10D07Z7, 10D07Z8, 10D17Z9, 10D17ZZ, 10D18Z9, 10D18ZZ, 10D27ZZ, 10D28ZZ, 10E0XZZ, 10H003Z, 10H00YZ, 10H073Z, 10H07YZ, 10J00ZZ, 10J03ZZ, 10J04ZZ, 10J07ZZ, 10J08ZZ, 10J0XZZ, 10J10ZZ, 10J13ZZ, 10J14ZZ, 10J17ZZ, 10J18ZZ, 10J1XZZ, 10J20ZZ, 10J23ZZ, 10J24ZZ, 10J27ZZ, 10J28ZZ, 10J2XZZ, 10P003Z, 10P00YZ, 10P073Z, 10P07YZ, 10Q00YE, 10Q00YF, 10Q00YG, 10Q00YH, 10Q00YJ, 10Q00YK, 10Q00YL, 10Q00YM, 10Q00YN, 10Q00YP, 10Q00YQ, 10Q00YR, 10Q00YS, 10Q00YT, 10Q00YV, 10Q00YY, 10Q00ZE, 10Q00ZF, 10Q00ZG, 10Q00ZH, 10Q00ZJ, 10Q00ZK, 10Q00ZL, 10Q00ZM, 10Q00ZN, 10Q00ZP, 10Q00ZQ, 10Q00ZR, 10Q00ZS, 10Q00ZT, 10Q00ZV, 10Q00ZY, 10Q03YE, 10Q03YF, 10Q03YG, 10Q03YH, 10Q03YJ, 10Q03YK, 10Q03YL, 10Q03YM, 10Q03YN, 10Q03YP, 10Q03YQ, 10Q03YR, 10Q03YS, 10Q03YT, 10Q03YV, 10Q03YY, 10Q03ZE, 10Q03ZF, 10Q03ZG, 10Q03ZH, 10Q03ZJ, 10Q03ZK, 10Q03ZL, 10Q03ZM, 10Q03ZN, 10Q03ZP, 10Q03ZQ, 10Q03ZR, 10Q03ZS, 10Q03ZT, 10Q03ZV, 10Q03ZY, 10Q04YE, 10Q04YF, 10Q04YG, 10Q04YH,

**Appendix**  
**Change in Gender on Record and Transgender Adults' Mental or Behavioral Health**  
**Yee et al.**

---

10Q04YJ, 10Q04YK, 10Q04YL, 10Q04YM, 10Q04YN, 10Q04YP,  
10Q04YQ, 10Q04YR, 10Q04YS, 10Q04YT, 10Q04YV, 10Q04YY, 10Q04ZE,  
10Q04ZF, 10Q04ZG, 10Q04ZH, 10Q04ZJ, 10Q04ZK, 10Q04ZL, 10Q04ZM,  
10Q04ZN, 10Q04ZP, 10Q04ZQ, 10Q04ZR, 10Q04ZS, 10Q04ZT, 10Q04ZV,  
10Q04ZY, 10Q07YE, 10Q07YF, 10Q07YG, 10Q07YH, 10Q07YJ, 10Q07YK,  
10Q07YL, 10Q07YM, 10Q07YN, 10Q07YP, 10Q07YQ, 10Q07YR,  
10Q07YS, 10Q07YT, 10Q07YV, 10Q07YY, 10Q07ZE, 10Q07ZF, 10Q07ZG,  
10Q07ZH, 10Q07ZJ, 10Q07ZK, 10Q07ZL, 10Q07ZM, 10Q07ZN, 10Q07ZP,  
10Q07ZQ, 10Q07ZR, 10Q07ZS, 10Q07ZT, 10Q07ZV, 10Q07ZY, 10Q08YE,  
10Q08YF, 10Q08YG, 10Q08YH, 10Q08YJ, 10Q08YK, 10Q08YL,  
10Q08YM, 10Q08YN, 10Q08YP, 10Q08YQ, 10Q08YR, 10Q08YS,  
10Q08YT, 10Q08YV, 10Q08YY, 10Q08ZE, 10Q08ZF, 10Q08ZG, 10Q08ZH,  
10Q08ZJ, 10Q08ZK, 10Q08ZL, 10Q08ZM, 10Q08ZN, 10Q08ZP, 10Q08ZQ,  
10Q08ZR, 10Q08ZS, 10Q08ZT, 10Q08ZV, 10Q08ZY, 10S07ZZ, 10S0XZZ,  
10S20ZZ, 10S23ZZ, 10S24ZZ, 10S27ZZ, 10S28ZZ, 10T20ZZ, 10T23ZZ,  
10T24ZZ, 10T27ZZ, 10T28ZZ, 10Y03ZE, 10Y03ZF, 10Y03ZG, 10Y03ZH,  
10Y03ZJ, 10Y03ZK, 10Y03ZL, 10Y03ZM, 10Y03ZN, 10Y03ZP, 10Y03ZQ,  
10Y03ZR, 10Y03ZS, 10Y03ZT, 10Y03ZV, 10Y03ZY, 10Y04ZE, 10Y04ZF,  
10Y04ZG, 10Y04ZH, 10Y04ZJ, 10Y04ZK, 10Y04ZL, 10Y04ZM, 10Y04ZN,  
10Y04ZP, 10Y04ZQ, 10Y04ZR, 10Y04ZS, 10Y04ZT, 10Y04ZV, 10Y04ZY,  
10Y07ZE, 10Y07ZF, 10Y07ZG, 10Y07ZH, 10Y07ZJ, 10Y07ZK, 10Y07ZL,  
10Y07ZM, 10Y07ZN, 10Y07ZP, 10Y07ZQ, 10Y07ZR, 10Y07ZS, 10Y07ZT,  
10Y07ZV, 10Y07ZY, 30273H1, 30273J1, 30273K1, 30273L1, 30273M1,  
30273N1, 30273P1, 30273Q1, 30273R1, 30273S1, 30273T1, 30273V1,  
30273W1, 30277H1, 30277J1, 30277K1, 30277L1, 30277M1, 30277N1,  
30277P1, 30277Q1, 30277R1, 30277S1, 30277T1, 30277V1, 30277W1,  
3E0E304, 3E0E305, 3E0E30M, 3E0E328, 3E0E329, 3E0E33Z, 3E0E36Z,  
3E0E37Z, 3E0E3BZ, 3E0E3GC, 3E0E3HZ, 3E0E3KZ, 3E0E3NZ, 3E0E3SF,  
3E0E3TZ, 3E0E4GC, 3E0E704, 3E0E705, 3E0E70M, 3E0E728, 3E0E729,  
3E0E73Z, 3E0E76Z, 3E0E77Z, 3E0E7BZ, 3E0E7GC, 3E0E7HZ, 3E0E7KZ,  
3E0E7NZ, 3E0E7SF, 3E0E7TZ, 3E0E804, 3E0E805, 3E0E80M, 3E0E828,  
3E0E829, 3E0E83Z, 3E0E86Z, 3E0E87Z, 3E0E8BZ, 3E0E8GC, 3E0E8HZ,  
3E0E8KZ, 3E0E8NZ, 3E0E8SF, 3E0E8TZ, 4A0H74Z, 4A0H7CZ, 4A0H7FZ,  
4A0H7HZ, 4A0H84Z, 4A0H8CZ, 4A0H8FZ, 4A0H8HZ, 4A0HX4Z,  
4A0HXCZ, 4A0HXFZ, 4A0HXHRZ, 4A0J72Z, 4A0J74Z, 4A0J7BZ, 4A0J82Z,  
4A0J84Z, 4A0J8BZ, 4A0JX2Z, 4A0JX4Z, 4A0JXBZ, 4A1H74Z, 4A1H7CZ,  
4A1H7FZ, 4A1H7HZ, 4A1H84Z, 4A1H8CZ, 4A1H8FZ, 4A1H8HZ,  
4A1HX4Z, 4A1HXCZ, 4A1HXFZ, 4A1HXHRZ, 4A1J72Z, 4A1J74Z,  
4A1J7BZ, 4A1J82Z, 4A1J84Z, 4A1J8BZ, 4A1JX2Z, 4A1JX4Z, 4A1JXBZ,  
BU3BY0Z, BU3BYZZ, BU3BZZZ, BY30Y0Z, BY30YZZ, BY30ZZZ,  
BY31Y0Z, BY31YZZ, BY31ZZZ, BY32Y0Z, BY32YZZ, BY32ZZZ,  
BY33Y0Z, BY33YZZ, BY33ZZZ, BY34YZZ, BY34ZZZ, BY35Y0Z,  
BY35YZZ, BY35ZZZ, BY36Y0Z, BY36YZZ, BY36ZZZ, BY47ZZZ,  
BY48ZZZ, BY49ZZZ, BY4BZZZ, BY4CZZZ, BY4DZZZ, BY4FZZZ,  
BY4GZZZ

**Male sex-specific care: Prostate-related**

**Appendix**  
**Change in Gender on Record and Transgender Adults' Mental or Behavioral Health**  
**Yee et al.**

|                                              |                                                                                                                                                                                                                                                                                                                                                                                                                                                                                                                                                                                                                                                                                                                                                                                                                                                                                                                                                                                                                                                                                                                                                                                                                                                                                                                                                                                                                                                                                                                                                                                                                                                                                                                                 |
|----------------------------------------------|---------------------------------------------------------------------------------------------------------------------------------------------------------------------------------------------------------------------------------------------------------------------------------------------------------------------------------------------------------------------------------------------------------------------------------------------------------------------------------------------------------------------------------------------------------------------------------------------------------------------------------------------------------------------------------------------------------------------------------------------------------------------------------------------------------------------------------------------------------------------------------------------------------------------------------------------------------------------------------------------------------------------------------------------------------------------------------------------------------------------------------------------------------------------------------------------------------------------------------------------------------------------------------------------------------------------------------------------------------------------------------------------------------------------------------------------------------------------------------------------------------------------------------------------------------------------------------------------------------------------------------------------------------------------------------------------------------------------------------|
| CPT/HCPCS                                    | 0005U, 0021U, 0047U, 0053U, 0113U, 0133U, 3269F, 3270F, 3271F, 3272F, 3273F, 3274F, 55700, 55705, 55706, 55720, 55725, 55801, 55810, 55812, 55815, 55821, 55831, 55840, 55842, 55845, 55860, 55862, 55865, 55866, 55873, 55875, 55876, 76873, 81313, 81539, 81541, 81542, 81551, 84152, 84153, 84154                                                                                                                                                                                                                                                                                                                                                                                                                                                                                                                                                                                                                                                                                                                                                                                                                                                                                                                                                                                                                                                                                                                                                                                                                                                                                                                                                                                                                            |
| ICD9CM                                       | V7644, 60000, 60001, 6019, 6011, 6010                                                                                                                                                                                                                                                                                                                                                                                                                                                                                                                                                                                                                                                                                                                                                                                                                                                                                                                                                                                                                                                                                                                                                                                                                                                                                                                                                                                                                                                                                                                                                                                                                                                                                           |
| ICD10CM                                      | A1814, A5422, A5902, B3881, C61, D075, D291, D400, N400, N401, N402, N403, N410, N411, N412, N413, N414, N418, N419, N420, N421, N4230, N4231, N4232, N4239, N4281, N4282, N4283, N4289, N429, N5231, N5234, N5237, Q554, R9720, R9721, S37822A, S37822D, S37822S, S37823A, S37823D, S37823S, S37828A, S37828D, S37828S, S37829A, S37829D, S37829S, T83410A, T83410D, T83410S, T83420A, T83420D, T83420S, T83490A, T83490D, T83490S, Y762, Z125, Z1503, Z8546, Z87430                                                                                                                                                                                                                                                                                                                                                                                                                                                                                                                                                                                                                                                                                                                                                                                                                                                                                                                                                                                                                                                                                                                                                                                                                                                           |
| ICD10PCS                                     | 0V24X0Z, 0V24XYZ, 0V500ZZ, 0V503ZZ, 0V504ZZ, 0V507ZZ, 0V508ZZ, 0V9000Z, 0V900ZX, 0V900ZZ, 0V9030Z, 0V903ZX, 0V903ZZ, 0V9040Z, 0V904ZX, 0V904ZZ, 0V9070Z, 0V907ZX, 0V907ZZ, 0V9080Z, 0V908ZX, 0V908ZZ, 0VB00ZX, 0VB00ZZ, 0VB03ZX, 0VB03ZZ, 0VB04ZX, 0VB04ZZ, 0VB07ZX, 0VB07ZZ, 0VB08ZX, 0VB08ZZ, 0VC00ZZ, 0VC03ZZ, 0VC04ZZ, 0VC07ZZ, 0VC08ZZ, 0VH001Z, 0VH031Z, 0VH041Z, 0VH071Z, 0VH081Z, 0VH403Z, 0VH40YZ, 0VH433Z, 0VH43YZ, 0VH443Z, 0VH44YZ, 0VH473Z, 0VH47YZ, 0VH483Z, 0VH48YZ, 0VJ40ZZ, 0VJ43ZZ, 0VJ44ZZ, 0VJ4XZZ, 0VN00ZZ, 0VN03ZZ, 0VN04ZZ, 0VN07ZZ, 0VN08ZZ, 0VP400Z, 0VP401Z, 0VP403Z, 0VP407Z, 0VP40JZ, 0VP40KZ, 0VP40YZ, 0VP430Z, 0VP431Z, 0VP433Z, 0VP437Z, 0VP43JZ, 0VP43KZ, 0VP43YZ, 0VP440Z, 0VP441Z, 0VP443Z, 0VP447Z, 0VP44JZ, 0VP44KZ, 0VP44YZ, 0VP470Z, 0VP471Z, 0VP473Z, 0VP477Z, 0VP47JZ, 0VP47KZ, 0VP47YZ, 0VP480Z, 0VP481Z, 0VP483Z, 0VP487Z, 0VP48JZ, 0VP48KZ, 0VP48YZ, 0VP4X0Z, 0VP4X1Z, 0VP4X3Z, 0VQ00ZZ, 0VQ03ZZ, 0VQ04ZZ, 0VQ07ZZ, 0VQ08ZZ, 0VT00ZZ, 0VT04ZZ, 0VT07ZZ, 0VT08ZZ, 0VW400Z, 0VW403Z, 0VW407Z, 0VW40JZ, 0VW40KZ, 0VW40YZ, 0VW430Z, 0VW433Z, 0VW437Z, 0VW43JZ, 0VW43KZ, 0VW43YZ, 0VW440Z, 0VW443Z, 0VW447Z, 0VW44JZ, 0VW44KZ, 0VW44YZ, 0VW470Z, 0VW473Z, 0VW477Z, 0VW47JZ, 0VW47KZ, 0VW47YZ, 0VW480Z, 0VW483Z, 0VW487Z, 0VW48JZ, 0VW48KZ, 0VW48YZ, 0VW4X0Z, 0VW4X3Z, 0VW4X7Z, 0VW4XJZ, 0VW4XKZ, 8E0VX1C, BV030ZZ, BV031ZZ, BV03YZZ, BV2300Z, BV230ZZ, BV2310Z, BV23Y0Z, BV23YZZ, BV23ZZZ, BV33Y0Z, BV33YZZ, BV33ZZZ, BV49ZZZ, DV000ZZ, DV001ZZ, DV002ZZ, DV003Z0, DV003ZZ, DV004ZZ, DV005ZZ, DV006ZZ, DV1097Z, DV1098Z, DV1099Z, DV109BZ, DV109CZ, DV109YZ, DV10B7Z, DV10B8Z, DV10B9Z, DV10BBZ, DV10BCZ, DV10BYZ, DV20DZZ, DV20HZZ, DV20JZZ, DVY07ZZ, DVY08ZZ, DVY0CZZ, DVY0FZZ, DVY0KZZ |
| <b>Male sex-specific care: Semen-related</b> |                                                                                                                                                                                                                                                                                                                                                                                                                                                                                                                                                                                                                                                                                                                                                                                                                                                                                                                                                                                                                                                                                                                                                                                                                                                                                                                                                                                                                                                                                                                                                                                                                                                                                                                                 |
| CPT/HCPCS                                    | 54700, 54800, 54830, 54840, 54860, 54861, 54865, 54900, 54901, 55200, 55250, 55300, 55500, 55520, 55530, 55535, 55550, 55559, 55600, 55605,                                                                                                                                                                                                                                                                                                                                                                                                                                                                                                                                                                                                                                                                                                                                                                                                                                                                                                                                                                                                                                                                                                                                                                                                                                                                                                                                                                                                                                                                                                                                                                                     |

**Appendix**  
**Change in Gender on Record and Transgender Adults' Mental or Behavioral Health**  
**Yee et al.**

|          |                                                                                                                                                                                                                                                                                                                                                                                                                                                                                                                                                                                                                                                                                                                                                                                                                                                                                                                                                                                                                                                                                                                                                                                                                                                                                                                                                                                                                                                                                                                                                                                                                                                                                                                                                                                                                                                                                                                                                                                                                                                                                                                                                                                                                                                                                                                                           |
|----------|-------------------------------------------------------------------------------------------------------------------------------------------------------------------------------------------------------------------------------------------------------------------------------------------------------------------------------------------------------------------------------------------------------------------------------------------------------------------------------------------------------------------------------------------------------------------------------------------------------------------------------------------------------------------------------------------------------------------------------------------------------------------------------------------------------------------------------------------------------------------------------------------------------------------------------------------------------------------------------------------------------------------------------------------------------------------------------------------------------------------------------------------------------------------------------------------------------------------------------------------------------------------------------------------------------------------------------------------------------------------------------------------------------------------------------------------------------------------------------------------------------------------------------------------------------------------------------------------------------------------------------------------------------------------------------------------------------------------------------------------------------------------------------------------------------------------------------------------------------------------------------------------------------------------------------------------------------------------------------------------------------------------------------------------------------------------------------------------------------------------------------------------------------------------------------------------------------------------------------------------------------------------------------------------------------------------------------------------|
|          | 55650, 55870, 89257, 89259, 89260, 89261, 89264, 89300, 89310, 89320, 89321, 89322, 89325, 89329, 89330, 89331, 89343, 89353, 00921, 00922                                                                                                                                                                                                                                                                                                                                                                                                                                                                                                                                                                                                                                                                                                                                                                                                                                                                                                                                                                                                                                                                                                                                                                                                                                                                                                                                                                                                                                                                                                                                                                                                                                                                                                                                                                                                                                                                                                                                                                                                                                                                                                                                                                                                |
| ICD9CM   | 60490, 6061, 60882, 60499                                                                                                                                                                                                                                                                                                                                                                                                                                                                                                                                                                                                                                                                                                                                                                                                                                                                                                                                                                                                                                                                                                                                                                                                                                                                                                                                                                                                                                                                                                                                                                                                                                                                                                                                                                                                                                                                                                                                                                                                                                                                                                                                                                                                                                                                                                                 |
| ICD10CM  | C6300, C6301, C6302, C6310, C6311, C6312, D176, D2930, D2931, D2932, F524, N4340, N4341, N4342, N4401, N4402, N4404, N451, N453, N454, N4601, N46021, N46022, N46023, N46024, N46025, N46029, N4611, N46121, N46122, N46123, N46124, N46125, N46129, N490, N491, N503, N5311, N5312, N5314, Q553, Q554, R361, Z8548, Z9852                                                                                                                                                                                                                                                                                                                                                                                                                                                                                                                                                                                                                                                                                                                                                                                                                                                                                                                                                                                                                                                                                                                                                                                                                                                                                                                                                                                                                                                                                                                                                                                                                                                                                                                                                                                                                                                                                                                                                                                                                |
| ICD10PCS | 0V1N07J, 0V1N07K, 0V1N07N, 0V1N07P, 0V1N0JJ, 0V1N0JK, 0V1N0JN, 0V1N0JP, 0V1N0KJ, 0V1N0KK, 0V1N0KN, 0V1N0KP, 0V1N0ZJ, 0V1N0ZK, 0V1N0ZN, 0V1N0ZP, 0V1N47J, 0V1N47K, 0V1N47N, 0V1N47P, 0V1N4JJ, 0V1N4JK, 0V1N4JN, 0V1N4JP, 0V1N4KJ, 0V1N4KK, 0V1N4KN, 0V1N4KP, 0V1N4ZJ, 0V1N4ZK, 0V1N4ZN, 0V1N4ZP, 0V1P07J, 0V1P07K, 0V1P07N, 0V1P07P, 0V1P0JJ, 0V1P0JK, 0V1P0JN, 0V1P0JP, 0V1P0KJ, 0V1P0KK, 0V1P0KN, 0V1P0KP, 0V1P0ZJ, 0V1P0ZK, 0V1P0ZN, 0V1P0ZP, 0V1P47J, 0V1P47K, 0V1P47N, 0V1P47P, 0V1P4JJ, 0V1P4JK, 0V1P4JN, 0V1P4JP, 0V1P4KJ, 0V1P4KK, 0V1P4KN, 0V1P4KP, 0V1P4ZJ, 0V1P4ZK, 0V1P4ZN, 0V1P4ZP, 0V1Q07J, 0V1Q07K, 0V1Q07N, 0V1Q07P, 0V1Q0JJ, 0V1Q0JK, 0V1Q0JN, 0V1Q0JP, 0V1Q0KJ, 0V1Q0KK, 0V1Q0KN, 0V1Q0KP, 0V1Q0ZJ, 0V1Q0ZK, 0V1Q0ZN, 0V1Q0ZP, 0V1Q47J, 0V1Q47K, 0V1Q47N, 0V1Q47P, 0V1Q4JJ, 0V1Q4JK, 0V1Q4JN, 0V1Q4JP, 0V1Q4KJ, 0V1Q4KK, 0V1Q4KN, 0V1Q4KP, 0V1Q4ZJ, 0V1Q4ZK, 0V1Q4ZN, 0V1Q4ZP, 0V24X0Z, 0V24XYZ, 0V2MX0Z, 0V2MXYZ, 0V2RX0Z, 0V2RXYZ, 0V510ZZ, 0V513ZZ, 0V514ZZ, 0V520ZZ, 0V523ZZ, 0V524ZZ, 0V530ZZ, 0V533ZZ, 0V534ZZ, 0V5F0ZZ, 0V5F3ZZ, 0V5F4ZZ, 0V5F8ZZ, 0V5G0ZZ, 0V5G3ZZ, 0V5G4ZZ, 0V5G8ZZ, 0V5H0ZZ, 0V5H3ZZ, 0V5H4ZZ, 0V5H8ZZ, 0V5J0ZZ, 0V5J3ZZ, 0V5J4ZZ, 0V5J8ZZ, 0V5K0ZZ, 0V5K3ZZ, 0V5K4ZZ, 0V5K8ZZ, 0V5L0ZZ, 0V5L3ZZ, 0V5L4ZZ, 0V5L8ZZ, 0V5N0ZZ, 0V5N3ZZ, 0V5N4ZZ, 0V5N8ZZ, 0V5P0ZZ, 0V5P3ZZ, 0V5P4ZZ, 0V5P8ZZ, 0V5Q0ZZ, 0V5Q3ZZ, 0V5Q4ZZ, 0V5Q8ZZ, 0V7N0DZ, 0V7N0ZZ, 0V7N3DZ, 0V7N3ZZ, 0V7N4DZ, 0V7N4ZZ, 0V7P0DZ, 0V7P0ZZ, 0V7P3DZ, 0V7P3ZZ, 0V7P4DZ, 0V7P4ZZ, 0V7Q0DZ, 0V7Q0ZZ, 0V7Q3DZ, 0V7Q3ZZ, 0V7Q4DZ, 0V7Q4ZZ, 0V9100Z, 0V910ZX, 0V910ZZ, 0V9130Z, 0V913ZX, 0V913ZZ, 0V9140Z, 0V914ZX, 0V914ZZ, 0V9200Z, 0V920ZX, 0V920ZZ, 0V9230Z, 0V923ZX, 0V923ZZ, 0V9240Z, 0V924ZX, 0V924ZZ, 0V9300Z, 0V930ZX, 0V930ZZ, 0V9330Z, 0V933ZX, 0V933ZZ, 0V9340Z, 0V934ZX, 0V934ZZ, 0V9F00Z, 0V9F0ZX, 0V9F0ZZ, 0V9F30Z, 0V9F3ZX, 0V9F3ZZ, 0V9F40Z, 0V9F4ZX, 0V9F4ZZ, 0V9G00Z, 0V9G0ZX, 0V9G0ZZ, 0V9G30Z, 0V9G3ZX, 0V9G3ZZ, 0V9G40Z, 0V9G4ZX, 0V9G4ZZ, 0V9H00Z, 0V9H0ZX, 0V9H0ZZ, 0V9H30Z, 0V9H3ZX, 0V9H3ZZ, 0V9H40Z, 0V9H4ZX, 0V9H4ZZ, 0V9J00Z, 0V9J0ZX, 0V9J0ZZ, 0V9J30Z, 0V9J3ZX, 0V9J3ZZ, 0V9J40Z, 0V9J4ZX, 0V9J4ZZ, 0V9K00Z, 0V9K0ZX, 0V9K0ZZ, 0V9K30Z, 0V9K3ZX, 0V9K3ZZ, 0V9K40Z, 0V9K4ZX, 0V9K4ZZ, 0V9L00Z, 0V9L0ZX, 0V9L0ZZ, 0V9L30Z, 0V9L3ZX, 0V9L3ZZ, 0V9L40Z, 0V9L4ZX, 0V9L4ZZ, 0V9N00Z, 0V9N0ZX, 0V9N0ZZ, 0V9N30Z, |

**Appendix**  
**Change in Gender on Record and Transgender Adults' Mental or Behavioral Health**  
**Yee et al.**

---

0V9N3ZX, 0V9N3ZZ, 0V9N40Z, 0V9N4ZX, 0V9N4ZZ, 0V9P00Z,  
0V9P0ZX, 0V9P0ZZ, 0V9P30Z, 0V9P3ZX, 0V9P3ZZ, 0V9P40Z, 0V9P4ZX,  
0V9P4ZZ, 0V9Q00Z, 0V9Q0ZX, 0V9Q0ZZ, 0V9Q30Z, 0V9Q3ZX,  
0V9Q3ZZ, 0V9Q40Z, 0V9Q4ZX, 0V9Q4ZZ, 0VB10ZX, 0VB10ZZ,  
0VB13ZX, 0VB13ZZ, 0VB14ZX, 0VB14ZZ, 0VB20ZX, 0VB20ZZ,  
0VB23ZX, 0VB23ZZ, 0VB24ZX, 0VB24ZZ, 0VB30ZX, 0VB30ZZ,  
0VB33ZX, 0VB33ZZ, 0VB34ZX, 0VB34ZZ, 0VBF0ZX, 0VBF0ZZ,  
0VBF3ZX, 0VBF3ZZ, 0VBF4ZX, 0VBF4ZZ, 0VBF8ZX, 0VBF8ZZ,  
0VBG0ZX, 0VBG0ZZ, 0VBG3ZX, 0VBG3ZZ, 0VBG4ZX, 0VBG4ZZ,  
0VBG8ZX, 0VBG8ZZ, 0VBH0ZX, 0VBH0ZZ, 0VBH3ZX, 0VBH3ZZ,  
0VBH4ZX, 0VBH4ZZ, 0VBH8ZX, 0VBH8ZZ, 0VBJ0ZX, 0VBJ0ZZ,  
0VBJ3ZX, 0VBJ3ZZ, 0VBJ4ZX, 0VBJ4ZZ, 0VBJ8ZX, 0VBJ8ZZ,  
0VBK0ZX, 0VBK0ZZ, 0VBK3ZX, 0VBK3ZZ, 0VBK4ZX, 0VBK4ZZ,  
0VBK8ZX, 0VBK8ZZ, 0VBL0ZX, 0VBL0ZZ, 0VBL3ZX, 0VBL3ZZ,  
0VBL4ZX, 0VBL4ZZ, 0VBL8ZX, 0VBL8ZZ, 0VBN0ZX, 0VBN0ZZ,  
0VBN3ZX, 0VBN3ZZ, 0VBN4ZX, 0VBN4ZZ, 0VBN8ZX, 0VBN8ZZ,  
0VBP0ZX, 0VBP0ZZ, 0VBP3ZX, 0VBP3ZZ, 0VBP4ZX, 0VBP4ZZ,  
0VBP8ZX, 0VBP8ZZ, 0VBQ0ZX, 0VBQ0ZZ, 0VBQ3ZX, 0VBQ3ZZ,  
0VBQ4ZX, 0VBQ4ZZ, 0VBQ8ZX, 0VBQ8ZZ, 0VC10ZZ, 0VC13ZZ,  
0VC14ZZ, 0VC20ZZ, 0VC23ZZ, 0VC24ZZ, 0VC30ZZ, 0VC33ZZ,  
0VC34ZZ, 0VCF0ZZ, 0VCF3ZZ, 0VCF4ZZ, 0VCG0ZZ, 0VCG3ZZ,  
0VCG4ZZ, 0VCH0ZZ, 0VCH3ZZ, 0VCH4ZZ, 0VCJ0ZZ, 0VCJ3ZZ,  
0VCJ4ZZ, 0VCK0ZZ, 0VCK3ZZ, 0VCK4ZZ, 0VCL0ZZ, 0VCL3ZZ,  
0VCL4ZZ, 0VCN0ZZ, 0VCN3ZZ, 0VCN4ZZ, 0VCP0ZZ, 0VCP3ZZ,  
0VCP4ZZ, 0VCQ0ZZ, 0VCQ3ZZ, 0VCQ4ZZ, 0VH403Z, 0VH40YZ,  
0VH433Z, 0VH43YZ, 0VH443Z, 0VH44YZ, 0VH473Z, 0VH47YZ,  
0VH483Z, 0VH48YZ, 0VHM03Z, 0VHM0YZ, 0VHM33Z, 0VHM3YZ,  
0VHM43Z, 0VHM4YZ, 0VHM73Z, 0VHM7YZ, 0VHM83Z, 0VHM8YZ,  
0VHR03Z, 0VHR0YZ, 0VHR33Z, 0VHR3YZ, 0VHR43Z, 0VHR4YZ,  
0VHR73Z, 0VHR7YZ, 0VHR83Z, 0VHR8YZ, 0VJ40ZZ, 0VJ43ZZ,  
0VJ44ZZ, 0VJ4XZZ, 0VJM0ZZ, 0VJM3ZZ, 0VJM4ZZ, 0VJMXZZ,  
0VJR0ZZ, 0VJR3ZZ, 0VJR4ZZ, 0VJRXZZ, 0VLF0CZ, 0VLF0DZ,  
0VLF0ZZ, 0VLF3CZ, 0VLF3DZ, 0VLF3ZZ, 0VLF4CZ, 0VLF4DZ,  
0VLF4ZZ, 0VLF8CZ, 0VLF8DZ, 0VLF8ZZ, 0VLG0CZ, 0VLG0DZ,  
0VLG0ZZ, 0VLG3CZ, 0VLG3DZ, 0VLG3ZZ, 0VLG4CZ, 0VLG4DZ,  
0VLG4ZZ, 0VLG8CZ, 0VLG8DZ, 0VLG8ZZ, 0VLH0CZ, 0VLH0DZ,  
0VLH0ZZ, 0VLH3CZ, 0VLH3DZ, 0VLH3ZZ, 0VLH4CZ, 0VLH4DZ,  
0VLH4ZZ, 0VLH8CZ, 0VLH8DZ, 0VLH8ZZ, 0VLN0CZ, 0VLN0DZ,  
0VLN0ZZ, 0VLN3CZ, 0VLN3DZ, 0VLN3ZZ, 0VLN4CZ, 0VLN4DZ,  
0VLN4ZZ, 0VLN8CZ, 0VLN8DZ, 0VLN8ZZ, 0VLP0CZ, 0VLP0DZ,  
0VLP0ZZ, 0VLP3CZ, 0VLP3DZ, 0VLP3ZZ, 0VLP4CZ, 0VLP4DZ,  
0VLP4ZZ, 0VLP8CZ, 0VLP8DZ, 0VLP8ZZ, 0VLQ0CZ, 0VLQ0DZ,  
0VLQ0ZZ, 0VLQ3CZ, 0VLQ3DZ, 0VLQ3ZZ, 0VLQ4CZ, 0VLQ4DZ,  
0VLQ4ZZ, 0VLQ8CZ, 0VLQ8DZ, 0VLQ8ZZ, 0VMF0ZZ, 0VMF4ZZ,  
0VMG0ZZ, 0VMG4ZZ, 0VMH0ZZ, 0VMH4ZZ, 0VN10ZZ, 0VN13ZZ,  
0VN14ZZ, 0VN20ZZ, 0VN23ZZ, 0VN24ZZ, 0VN30ZZ, 0VN33ZZ,

---

**Appendix**  
**Change in Gender on Record and Transgender Adults' Mental or Behavioral Health**  
**Yee et al.**

---

0VN34ZZ, 0VNF0ZZ, 0VNF3ZZ, 0VNF4ZZ, 0VNF8ZZ, 0VNG0ZZ,  
0VNG3ZZ, 0VNG4ZZ, 0VNG8ZZ, 0VNH0ZZ, 0VNH3ZZ, 0VNH4ZZ,  
0VNH8ZZ, 0VNJ0ZZ, 0VNJ3ZZ, 0VNJ4ZZ, 0VNJ8ZZ, 0VNK0ZZ,  
0VNK3ZZ, 0VNK4ZZ, 0VNK8ZZ, 0VNL0ZZ, 0VNL3ZZ, 0VNL4ZZ,  
0VNL8ZZ, 0VNN0ZZ, 0VNN3ZZ, 0VNN4ZZ, 0VNN8ZZ, 0VNP0ZZ,  
0VNP3ZZ, 0VNP4ZZ, 0VNP8ZZ, 0VNQ0ZZ, 0VNQ3ZZ, 0VNQ4ZZ,  
0VNQ8ZZ, 0VP400Z, 0VP401Z, 0VP403Z, 0VP407Z, 0VP40JZ, 0VP40KZ,  
0VP40YZ, 0VP430Z, 0VP431Z, 0VP433Z, 0VP437Z, 0VP43JZ, 0VP43KZ,  
0VP43YZ, 0VP440Z, 0VP441Z, 0VP443Z, 0VP447Z, 0VP44JZ, 0VP44KZ,  
0VP44YZ, 0VP470Z, 0VP471Z, 0VP473Z, 0VP477Z, 0VP47JZ, 0VP47KZ,  
0VP47YZ, 0VP480Z, 0VP481Z, 0VP483Z, 0VP487Z, 0VP48JZ, 0VP48KZ,  
0VP48YZ, 0VP4X0Z, 0VP4X1Z, 0VP4X3Z, 0VPM00Z, 0VPM03Z,  
0VPM07Z, 0VPM0CZ, 0VPM0JZ, 0VPM0KZ, 0VPM0YZ, 0VPM30Z,  
0VPM33Z, 0VPM37Z, 0VPM3CZ, 0VPM3JZ, 0VPM3KZ, 0VPM3YZ,  
0VPM40Z, 0VPM43Z, 0VPM47Z, 0VPM4CZ, 0VPM4JZ, 0VPM4KZ,  
0VPM4YZ, 0VPM70Z, 0VPM73Z, 0VPM77Z, 0VPM7CZ, 0VPM7JZ,  
0VPM7KZ, 0VPM7YZ, 0VPM80Z, 0VPM83Z, 0VPM87Z, 0VPM8CZ,  
0VPM8JZ, 0VPM8KZ, 0VPM8YZ, 0VPMX0Z, 0VPMX3Z, 0VPR00Z,  
0VPR03Z, 0VPR07Z, 0VPR0CZ, 0VPR0DZ, 0VPR0JZ, 0VPR0KZ,  
0VPR0YZ, 0VPR30Z, 0VPR33Z, 0VPR37Z, 0VPR3CZ, 0VPR3DZ,  
0VPR3JZ, 0VPR3KZ, 0VPR3YZ, 0VPR40Z, 0VPR43Z, 0VPR47Z,  
0VPR4CZ, 0VPR4DZ, 0VPR4JZ, 0VPR4KZ, 0VPR4YZ, 0VPR70Z,  
0VPR73Z, 0VPR77Z, 0VPR7CZ, 0VPR7DZ, 0VPR7JZ, 0VPR7KZ,  
0VPR7YZ, 0VPR80Z, 0VPR83Z, 0VPR87Z, 0VPR8CZ, 0VPR8DZ,  
0VPR8JZ, 0VPR8KZ, 0VPR8YZ, 0VPRX0Z, 0VPRX3Z, 0VPRXDZ,  
0VQ10ZZ, 0VQ13ZZ, 0VQ14ZZ, 0VQ20ZZ, 0VQ23ZZ, 0VQ24ZZ,  
0VQ30ZZ, 0VQ33ZZ, 0VQ34ZZ, 0VQF0ZZ, 0VQF3ZZ, 0VQF4ZZ,  
0VQF8ZZ, 0VQG0ZZ, 0VQG3ZZ, 0VQG4ZZ, 0VQG8ZZ, 0VQH0ZZ,  
0VQH3ZZ, 0VQH4ZZ, 0VQH8ZZ, 0VQJ0ZZ, 0VQJ3ZZ, 0VQJ4ZZ,  
0VQJ8ZZ, 0VQK0ZZ, 0VQK3ZZ, 0VQK4ZZ, 0VQK8ZZ, 0VQL0ZZ,  
0VQL3ZZ, 0VQL4ZZ, 0VQL8ZZ, 0VQN0ZZ, 0VQN3ZZ, 0VQN4ZZ,  
0VQN8ZZ, 0VQP0ZZ, 0VQP3ZZ, 0VQP4ZZ, 0VQP8ZZ, 0VQQ0ZZ,  
0VQQ3ZZ, 0VQQ4ZZ, 0VQQ8ZZ, 0VSF0ZZ, 0VSF3ZZ, 0VSF4ZZ,  
0VSF8ZZ, 0VSG0ZZ, 0VSG3ZZ, 0VSG4ZZ, 0VSG8ZZ, 0VSH0ZZ,  
0VSH3ZZ, 0VSH4ZZ, 0VSH8ZZ, 0VT10ZZ, 0VT14ZZ, 0VT20ZZ,  
0VT24ZZ, 0VT30ZZ, 0VT34ZZ, 0VTF0ZZ, 0VTF4ZZ, 0VTG0ZZ,  
0VTG4ZZ, 0VTH0ZZ, 0VTH4ZZ, 0VTJ0ZZ, 0VTJ4ZZ, 0VTK0ZZ,  
0VTK4ZZ, 0VTL0ZZ, 0VTL4ZZ, 0VTN0ZZ, 0VTN4ZZ, 0VTP0ZZ,  
0VTP4ZZ, 0VTQ0ZZ, 0VTQ4ZZ, 0VU107Z, 0VU10JZ, 0VU10KZ,  
0VU147Z, 0VU14JZ, 0VU14KZ, 0VU187Z, 0VU18JZ, 0VU18KZ, 0VU207Z,  
0VU20JZ, 0VU20KZ, 0VU247Z, 0VU24JZ, 0VU24KZ, 0VU287Z, 0VU28JZ,  
0VU28KZ, 0VU307Z, 0VU30JZ, 0VU30KZ, 0VU347Z, 0VU34JZ,  
0VU34KZ, 0VU387Z, 0VU38JZ, 0VU38KZ, 0VUF07Z, 0VUF0JZ,  
0VUF0KZ, 0VUF47Z, 0VUF4JZ, 0VUF4KZ, 0VUF87Z, 0VUF8JZ,  
0VUF8KZ, 0VUG07Z, 0VUG0JZ, 0VUG0KZ, 0VUG47Z, 0VUG4JZ,  
0VUG4KZ, 0VUG87Z, 0VUG8JZ, 0VUG8KZ, 0VUH07Z, 0VUH0JZ,

---



**Appendix**  
**Change in Gender on Record and Transgender Adults' Mental or Behavioral Health**  
**Yee et al.**

---

0VUH0KZ, 0VUH47Z, 0VUH4JZ, 0VUH4KZ, 0VUH87Z, 0VUH8JZ, 0VUH8KZ, 0VUJ07Z, 0VUJ0JZ, 0VUJ0KZ, 0VUJ47Z, 0VUJ4JZ, 0VUJ4KZ, 0VUJ87Z, 0VUJ8JZ, 0VUJ8KZ, 0VUK07Z, 0VUK0JZ, 0VUK0KZ, 0VUK47Z, 0VUK4JZ, 0VUK4KZ, 0VUK87Z, 0VUK8JZ, 0VUK8KZ, 0VUL07Z, 0VUL0JZ, 0VUL0KZ, 0VUL47Z, 0VUL4JZ, 0VUL4KZ, 0VUL87Z, 0VUL8JZ, 0VUL8KZ, 0VUN07Z, 0VUN0JZ, 0VUN0KZ, 0VUN47Z, 0VUN4JZ, 0VUN4KZ, 0VUN87Z, 0VUN8JZ, 0VUN8KZ, 0VUP07Z, 0VUP0JZ, 0VUP0KZ, 0VUP47Z, 0VUP4JZ, 0VUP4KZ, 0VUP87Z, 0VUP8JZ, 0VUP8KZ, 0VUQ07Z, 0VUQ0JZ, 0VUQ0KZ, 0VUQ47Z, 0VUQ4JZ, 0VUQ4KZ, 0VUQ87Z, 0VUQ8JZ, 0VUQ8KZ, 0VW400Z, 0VW403Z, 0VW407Z, 0VW40JZ, 0VW40KZ, 0VW40YZ, 0VW430Z, 0VW433Z, 0VW437Z, 0VW43JZ, 0VW43KZ, 0VW43YZ, 0VW440Z, 0VW443Z, 0VW447Z, 0VW44JZ, 0VW44KZ, 0VW44YZ, 0VW470Z, 0VW473Z, 0VW477Z, 0VW47JZ, 0VW47KZ, 0VW47YZ, 0VW480Z, 0VW483Z, 0VW487Z, 0VW48JZ, 0VW48KZ, 0VW48YZ, 0VW4X0Z, 0VW4X3Z, 0VW4X7Z, 0VW4XJZ, 0VW4XKZ, 0VWM00Z, 0VWM03Z, 0VWM07Z, 0VWM0CZ, 0VWM0JZ, 0VWM0KZ, 0VWM0YZ, 0VWM30Z, 0VWM33Z, 0VWM37Z, 0VWM3CZ, 0VWM3JZ, 0VWM3KZ, 0VWM3YZ, 0VWM40Z, 0VWM43Z, 0VWM47Z, 0VWM4CZ, 0VWM4JZ, 0VWM4KZ, 0VWM4YZ, 0VWM70Z, 0VWM73Z, 0VWM77Z, 0VWM7CZ, 0VWM7JZ, 0VWM7KZ, 0VWM7YZ, 0VWM80Z, 0VWM83Z, 0VWM87Z, 0VWM8CZ, 0VWM8JZ, 0VWM8KZ, 0VWM8YZ, 0VWMX0Z, 0VWMX3Z, 0VWMX7Z, 0VWMXCZ, 0VWMXJZ, 0VWMXKZ, 0VWR00Z, 0VWR03Z, 0VWR07Z, 0VWR0CZ, 0VWR0DZ, 0VWR0JZ, 0VWR0KZ, 0VWR0YZ, 0VWR30Z, 0VWR33Z, 0VWR37Z, 0VWR3CZ, 0VWR3DZ, 0VWR3JZ, 0VWR3KZ, 0VWR3YZ, 0VWR40Z, 0VWR43Z, 0VWR47Z, 0VWR4CZ, 0VWR4DZ, 0VWR4JZ, 0VWR4KZ, 0VWR4YZ, 0VWR70Z, 0VWR73Z, 0VWR77Z, 0VWR7CZ, 0VWR7DZ, 0VWR7JZ, 0VWR7KZ, 0VWR7YZ, 0VWR80Z, 0VWR83Z, 0VWR87Z, 0VWR8CZ, 0VWR8DZ, 0VWR8JZ, 0VWR8KZ, 0VWR8YZ, 0VWRX0Z, 0VWRX3Z, 0VWRX7Z, 0VWRXCZ, 0VWRXDZ, 0VWRXJZ, 0VWRXKZ, 3E0P3LZ, 3E0P7LZ, 8E0VX63, BV010ZZ, BV011ZZ, BV01YZZ, BV020ZZ, BV021ZZ, BV02YZZ, BV49ZZZ

**Additional female sex-specific care**

CPT/HCPCS 56405, 56420, 56440, 56441, 56442, 56501, 56515, 56605, 56606, 56620, 56625, 56630, 56631, 56632, 56633, 56634, 56637, 56640, 56700, 56740, 56810, 56820, 56821, 57000, 57010, 57020, 57022, 57023, 57061, 57065, 57100, 57105, 57452, 57454, 57455, 57456, 57460, 57461, 57500, 57505, 57510, 57511, 57513, 57520, 57522, 57530, 57531, 57540, 57545, 57550, 57555, 57556, 57558, 57800, 58100, 58110, 58120, 58140, 58145, 58146, 58300, 58301, 58323, 58340, 58345, 58346, 58350, 58353, 58356, 58400, 58410, 58545, 58546, 58548, 58555, 58558, 58559, 58560, 58561, 58562, 58563, 58565, 58575, 58578, 58579, 58674, 58823, 58999, 74775, 76815, 76816, 76817, 77031, 77032, 77046, 77047, 77048, 77049, 77051, 77052, 77053, 77054, 77055, 77056, 77057, 77061, 77062, 77063, 77065, 77066, 77067, 80055, 80081, 81535, 81536, 82120, 88141, 88142, 88143, 88147,

---

**Appendix**  
**Change in Gender on Record and Transgender Adults' Mental or Behavioral Health**  
**Yee et al.**

|         |                                                                                                                                                                                                                                                                                                                                                                                                                                                                                                                                                                                                                                                                                                                                                                                                                                                                                                                                                                                                                                                                                                                                                                                                                                                                                                                                                                                                                                                                                                                                                                                                                                                                                                                                                                                                                                                                                                                                                                                                                                                                                                                                                                                                                                                                                                                                                                                                                                                                                                                                                                                                                                                                                                                                         |
|---------|-----------------------------------------------------------------------------------------------------------------------------------------------------------------------------------------------------------------------------------------------------------------------------------------------------------------------------------------------------------------------------------------------------------------------------------------------------------------------------------------------------------------------------------------------------------------------------------------------------------------------------------------------------------------------------------------------------------------------------------------------------------------------------------------------------------------------------------------------------------------------------------------------------------------------------------------------------------------------------------------------------------------------------------------------------------------------------------------------------------------------------------------------------------------------------------------------------------------------------------------------------------------------------------------------------------------------------------------------------------------------------------------------------------------------------------------------------------------------------------------------------------------------------------------------------------------------------------------------------------------------------------------------------------------------------------------------------------------------------------------------------------------------------------------------------------------------------------------------------------------------------------------------------------------------------------------------------------------------------------------------------------------------------------------------------------------------------------------------------------------------------------------------------------------------------------------------------------------------------------------------------------------------------------------------------------------------------------------------------------------------------------------------------------------------------------------------------------------------------------------------------------------------------------------------------------------------------------------------------------------------------------------------------------------------------------------------------------------------------------------|
|         | 88148, 88150, 88152, 88153, 88155, 88164, 88165, 88166, 88167, 88174, 88175, 00940, 00942, 00948, 00950, 0102U, 0128U, 0129U, 0131U, 0135U, 01958, 3015F, 4340F, G0202, G0279, G9899, G9900, S8075                                                                                                                                                                                                                                                                                                                                                                                                                                                                                                                                                                                                                                                                                                                                                                                                                                                                                                                                                                                                                                                                                                                                                                                                                                                                                                                                                                                                                                                                                                                                                                                                                                                                                                                                                                                                                                                                                                                                                                                                                                                                                                                                                                                                                                                                                                                                                                                                                                                                                                                                      |
| ICD9CM  | 1121, 2181, 2189, 6160, 61610, 6200, 6202, 62211, 6228, 6248, 7950, 79503, 79505, V762, V2503, V2511, V2542, V2512, V2513, V2543, V8801, V4551, V2651, 6259, 6299, 7954                                                                                                                                                                                                                                                                                                                                                                                                                                                                                                                                                                                                                                                                                                                                                                                                                                                                                                                                                                                                                                                                                                                                                                                                                                                                                                                                                                                                                                                                                                                                                                                                                                                                                                                                                                                                                                                                                                                                                                                                                                                                                                                                                                                                                                                                                                                                                                                                                                                                                                                                                                 |
| ICD10CM | A1816, A1817, A1818, A34, A5142, A5402, A5403, A5424, A5602, A5611, A5901, A6003, A6004, B373, C50011, C50012, C50019, C50111, C50112, C50119, C50211, C50212, C50219, C50311, C50312, C50319, C50411, C50412, C50419, C50511, C50512, C50519, C50611, C50612, C50619, C50811, C50812, C50819, C50911, C50912, C50919, C510, C511, C512, C518, C519, C52, C530, C531, C538, C539, C540, C542, C543, C548, C549, C55, C5710, C5711, C5712, C5720, C5721, C5722, C573, C574, C577, C578, C579, D060, D061, D067, D069, D071, D072, D0730, D0739, D250, D251, D252, D259, D260, D261, D267, D269, D280, D281, D282, D287, D289, D390, D398, D399, F5222, F5231, F525, F531, I863, L292, M830, N35028, N3512, N3582, N3592, N710, N711, N719, N72, N730, N731, N732, N733, N734, N735, N736, N738, N739, N74, N750, N751, N758, N759, N762, N763, N7681, N8110, N8111, N8112, N812, N813, N814, N815, N816, N8181, N8182, N8183, N8185, N820, N822, N823, N824, N836, N837, N840, N841, N842, N843, N848, N849, N852, N853, N854, N855, N856, N857, N858, N859, N86, N870, N871, N879, N880, N881, N882, N883, N884, N888, N889, N891, N894, N895, N896, N897, N900, N901, N903, N904, N905, N9060, N9061, N9069, N907, N90810, N90811, N90812, N90813, N90818, N9089, N909, N930, N931, N938, N939, N940, N9412, N942, N94810, N94818, N94819, O010, O011, O019, O020, O159, O620, O621, O622, O624, O665, O713, O714, O715, O716, O717, O7181, O7182, O7189, O719, O720, O754, O85, O8600, O8601, O8602, O8603, O8604, O8609, O8681, O8689, O901, O902, O923, O924, O926, Q510, Q5110, Q5111, Q5120, Q5121, Q5122, Q5128, Q513, Q514, Q515, Q517, Q51810, Q51811, Q51818, Q51820, Q51821, Q51828, Q519, Q520, Q5210, Q5211, Q52120, Q52121, Q52122, Q52123, Q52124, Q52129, Q522, Q523, Q524, Q525, Q526, Q5270, Q5271, Q5279, Q528, Q529, Q562, Q960, Q961, Q962, Q963, Q964, Q968, Q969, Q970, Q971, Q972, Q973, Q978, Q979, R870, R871, R872, R873, R874, R875, R87610, R87611, R87612, R87613, R87614, R87615, R87616, R87618, R87619, R87620, R87621, R87622, R87623, R87624, R87625, R87628, R87629, R8769, R877, R87810, R87811, R87820, R87821, R8789, R879, S30844A, S30844D, S30844S, S30846A, S30846D, S30846S, S30854A, S30854D, S30854S, S30856A, S30856D, S30856S, S30864A, S30864D, S30864S, S30866A, S30866D, S30866S, S30874A, S30874D, S30874S, S30876A, S30876D, S30876S, S3141XA, S3141XD, S3141XS, S3142XA, S3142XD, S3142XS, S3143XA, S3143XD, S3143XS, S3144XA, S3144XD, S3144XS, S3145XA, S3145XD, S3145XS, S31512A, S31512D, S31512S, S31522A, S31522D, S31522S, S31532A, S31532D, S31532S, S31542A, S31542D, S31542S, S31552A, S31552D, S31552S, S35531A, S35531D, S35531S, S35532A, S35532D, S35532S, S35533A, |

**Appendix**  
**Change in Gender on Record and Transgender Adults' Mental or Behavioral Health**  
**Yee et al.**

S35533D, S35533S, S35534A, S35534D, S35534S, S35535A, S35535D, S35535S, S35536A, S35536D, S35536S, S3760XA, S3760XD, S3760XS, S3762XA, S3762XD, S3762XS, S3763XA, S3763XD, S3763XS, S3769XA, S3769XD, S3769XS, S38002A, S38002D, S38002S, S3803XA, S3803XD, S3803XS, S38211A, S38211D, S38211S, S38212A, S38212D, S38212S, T192XXA, T192XXD, T192XXS, T193XXA, T193XXD, T193XXS, T2107XA, T2107XD, T2107XS, T2117XA, T2117XD, T2117XS, T2127XA, T2127XD, T2127XS, T2137XA, T2137XD, T2137XS, T2147XA, T2147XD, T2147XS, T2157XA, T2157XD, T2157XS, T2167XA, T2167XD, T2167XS, T2177XA, T2177XD, T2177XS, T8331XA, T8331XD, T8331XS, T8332XA, T8332XD, T8332XS, T8339XA, T8339XD, T8339XS, T83711A, T83711D, T83711S, T83721A, T83721D, T83721S, Y760, Y761, Y763, Y768, Z0142, Z0375, Z124, Z1272, Z30012, Z30014, Z30015, Z30430, Z30431, Z30432, Z30433, Z3044, Z31430, Z31438, Z3182, Z8540, Z8541, Z8542, Z8544, Z86001, Z87410, Z87411, Z87412, Z90710, Z90711, Z90712, Z975, Z9851, Z98891, N760, N761, Z8742

**ICD10PCS**

04LE0CT, 04LE0DT, 04LE0ZT, 04LE3CT, 04LE3DT, 04LE3ZT, 04LE4CT, 04LE4DT, 04LE4ZT, 04LF0CU, 04LF0DU, 04LF0ZU, 04LF3CU, 04LF3DU, 04LF3ZU, 04LF4CU, 04LF4DU, 04LF4ZU, 0U2DX0Z, 0U2DXHZ, 0U2DXYZ, 0U2HX0Z, 0U2HXGZ, 0U2HXYZ, 0U2MX0Z, 0U2MXYZ, 0U540ZZ, 0U543ZZ, 0U544ZZ, 0U548ZZ, 0U590ZZ, 0U593ZZ, 0U594ZZ, 0U597ZZ, 0U598ZZ, 0U5C0ZZ, 0U5C3ZZ, 0U5C4ZZ, 0U5C7ZZ, 0U5C8ZZ, 0U5F0ZZ, 0U5F3ZZ, 0U5F4ZZ, 0U5F7ZZ, 0U5F8ZZ, 0U5G0ZZ, 0U5G3ZZ, 0U5G4ZZ, 0U5G7ZZ, 0U5G8ZZ, 0U5GXZZ, 0U5J0ZZ, 0U5JXZZ, 0U5K0ZZ, 0U5K3ZZ, 0U5K4ZZ, 0U5K7ZZ, 0U5K8ZZ, 0U5KXZZ, 0U5L0ZZ, 0U5LXZZ, 0U5M0ZZ, 0U5MXZZ, 0U790DZ, 0U790ZZ, 0U793DZ, 0U793ZZ, 0U794DZ, 0U794ZZ, 0U797DZ, 0U797ZZ, 0U798DZ, 0U798ZZ, 0U7C0DZ, 0U7C0ZZ, 0U7C3DZ, 0U7C3ZZ, 0U7C4DZ, 0U7C4ZZ, 0U7C7DZ, 0U7C7ZZ, 0U7C8DZ, 0U7C8ZZ, 0U7G0DZ, 0U7G0ZZ, 0U7G3DZ, 0U7G3ZZ, 0U7G4DZ, 0U7G4ZZ, 0U7G7DZ, 0U7G7ZZ, 0U7G8DZ, 0U7G8ZZ, 0U7K0DZ, 0U7K0ZZ, 0U7K3DZ, 0U7K3ZZ, 0U7K4DZ, 0U7K4ZZ, 0U7K7DZ, 0U7K7ZZ, 0U7K8DZ, 0U7K8ZZ, 0U7KXDZ, 0U7KXZZ, 0U840ZZ, 0U843ZZ, 0U844ZZ, 0U8K7ZZ, 0U8K8ZZ, 0U8KXZZ, 0U9400Z, 0U940ZX, 0U940ZZ, 0U9430Z, 0U943ZX, 0U943ZZ, 0U9440Z, 0U944ZX, 0U944ZZ, 0U9480Z, 0U948ZX, 0U948ZZ, 0U9900Z, 0U990ZX, 0U990ZZ, 0U9930Z, 0U993ZX, 0U993ZZ, 0U9940Z, 0U994ZX, 0U994ZZ, 0U9970Z, 0U997ZX, 0U997ZZ, 0U9980Z, 0U998ZX, 0U998ZZ, 0U9C00Z, 0U9C0ZX, 0U9C0ZZ, 0U9C30Z, 0U9C3ZX, 0U9C3ZZ, 0U9C40Z, 0U9C4ZX, 0U9C4ZZ, 0U9C70Z, 0U9C7ZX, 0U9C7ZZ, 0U9C80Z, 0U9C8ZX, 0U9C8ZZ, 0U9F00Z, 0U9F0ZX, 0U9F0ZZ, 0U9F30Z, 0U9F3ZX, 0U9F3ZZ, 0U9F40Z, 0U9F4ZX, 0U9F4ZZ, 0U9F70Z, 0U9F7ZX, 0U9F7ZZ, 0U9F80Z, 0U9F8ZX, 0U9F8ZZ, 0U9G00Z, 0U9G0ZX, 0U9G0ZZ, 0U9G30Z, 0U9G3ZX, 0U9G3ZZ, 0U9G40Z, 0U9G4ZX, 0U9G4ZZ, 0U9G70Z, 0U9G7ZX, 0U9G7ZZ, 0U9G80Z, 0U9G8ZX, 0U9G8ZZ, 0U9GX0Z, 0U9GXZX, 0U9GXZZ, 0U9J00Z, 0U9J0ZX, 0U9J0ZZ, 0U9JX0Z, 0U9JXZX, 0U9JXZZ, 0U9K00Z, 0U9K0ZX, 0U9K0ZZ,

**Appendix**  
**Change in Gender on Record and Transgender Adults' Mental or Behavioral Health**  
**Yee et al.**

0U9K30Z, 0U9K3ZX, 0U9K3ZZ, 0U9K40Z, 0U9K4ZX, 0U9K4ZZ,  
0U9K70Z, 0U9K7ZX, 0U9K7ZZ, 0U9K80Z, 0U9K8ZX, 0U9K8ZZ,  
0U9KX0Z, 0U9KXZX, 0U9KXZZ, 0U9L00Z, 0U9L0ZX, 0U9L0ZZ,  
0U9LX0Z, 0U9LXZX, 0U9LXZZ, 0U9M00Z, 0U9M0ZX, 0U9M0ZZ,  
0U9MX0Z, 0U9MXZX, 0U9MXZZ, 0UB40ZX, 0UB40ZZ, 0UB43ZX,  
0UB43ZZ, 0UB44ZX, 0UB44ZZ, 0UB47ZX, 0UB47ZZ, 0UB48ZX,  
0UB48ZZ, 0UB90ZX, 0UB90ZZ, 0UB93ZX, 0UB93ZZ, 0UB94ZX,  
0UB94ZZ, 0UB97ZX, 0UB97ZZ, 0UB98ZX, 0UB98ZZ, 0UBC0ZX,  
0UBC0ZZ, 0UBC3ZX, 0UBC3ZZ, 0UBC4ZX, 0UBC4ZZ, 0UBC7ZX,  
0UBC7ZZ, 0UBC8ZX, 0UBC8ZZ, 0UBF0ZX, 0UBF0ZZ, 0UBF3ZX,  
0UBF3ZZ, 0UBF4ZX, 0UBF4ZZ, 0UBF7ZX, 0UBF7ZZ, 0UBF8ZX,  
0UBF8ZZ, 0UBG0ZX, 0UBG0ZZ, 0UBG3ZX, 0UBG3ZZ, 0UBG4ZX,  
0UBG4ZZ, 0UBG7ZX, 0UBG7ZZ, 0UBG8ZX, 0UBG8ZZ, 0UBGXZX,  
0UBGXZZ, 0UBJ0ZX, 0UBJ0ZZ, 0UBJXZX, 0UBJXZZ, 0UBK0ZX,  
0UBK0ZZ, 0UBK3ZX, 0UBK3ZZ, 0UBK4ZX, 0UBK4ZZ, 0UBK7ZX,  
0UBK7ZZ, 0UBK8ZX, 0UBK8ZZ, 0UBKXZX, 0UBKXZZ, 0UBL0ZX,  
0UBL0ZZ, 0UBLXZX, 0UBLXZZ, 0UBM0ZX, 0UBM0ZZ, 0UBMXZX,  
0UBMXZZ, 0UC40ZZ, 0UC43ZZ, 0UC44ZZ, 0UC48ZZ, 0UC90ZZ,  
0UC93ZZ, 0UC94ZZ, 0UC97ZZ, 0UC98ZZ, 0UCC0ZZ, 0UCC3ZZ,  
0UCC4ZZ, 0UCC7ZZ, 0UCC8ZZ, 0UCF0ZZ, 0UCF3ZZ, 0UCF4ZZ,  
0UCF7ZZ, 0UCF8ZZ, 0UCG0ZZ, 0UCG3ZZ, 0UCG4ZZ, 0UCG7ZZ,  
0UCG8ZZ, 0UCGXZZ, 0UCJ0ZZ, 0UCJXZZ, 0UCK0ZZ, 0UCK3ZZ,  
0UCK4ZZ, 0UCK7ZZ, 0UCK8ZZ, 0UCKXZZ, 0UCL0ZZ, 0UCLXZZ,  
0UCM0ZZ, 0UCMXZZ, 0UDN0ZZ, 0UDN3ZZ, 0UDN4ZZ, 0UF90ZZ,  
0UF93ZZ, 0UF94ZZ, 0UF97ZZ, 0UF98ZZ, 0UF9XZZ, 0UH90HZ,  
0UH97HZ, 0UH98HZ, 0UHC01Z, 0UHC31Z, 0UHC41Z, 0UHC71Z,  
0UHC7HZ, 0UHC81Z, 0UHC8HZ, 0UHD03Z, 0UHD0YZ, 0UHD33Z,  
0UHD3YZ, 0UHD43Z, 0UHD4YZ, 0UHD73Z, 0UHD7YZ, 0UHD83Z,  
0UHD8YZ, 0UHF7GZ, 0UHF8GZ, 0UHG01Z, 0UHG31Z, 0UHG41Z,  
0UHG71Z, 0UHG7GZ, 0UHG81Z, 0UHG8GZ, 0UHGX1Z, 0UHH03Z,  
0UHH0YZ, 0UHH33Z, 0UHH3YZ, 0UHH43Z, 0UHH4YZ, 0UHH73Z,  
0UHH7YZ, 0UHH83Z, 0UHH8YZ, 0UJD0ZZ, 0UJD3ZZ, 0UJD4ZZ,  
0UJD7ZZ, 0UJD8ZZ, 0UJDXZZ, 0UJH0ZZ, 0UJH3ZZ, 0UJH4ZZ, 0UJH7ZZ,  
0UJH8ZZ, 0UJHXZZ, 0UJM0ZZ, 0UJMXZZ, 0ULF7DZ, 0ULF7ZZ,  
0ULF8DZ, 0ULF8ZZ, 0ULG7DZ, 0ULG7ZZ, 0ULG8DZ, 0ULG8ZZ,  
0UM40ZZ, 0UM44ZZ, 0UM90ZZ, 0UM94ZZ, 0UMC0ZZ, 0UMC4ZZ,  
0UMF0ZZ, 0UMF4ZZ, 0UMG0ZZ, 0UMG4ZZ, 0UMJXZZ, 0UMK0ZZ,  
0UMK4ZZ, 0UMKXZZ, 0UMMXZZ, 0UN40ZZ, 0UN43ZZ, 0UN44ZZ,  
0UN48ZZ, 0UN90ZZ, 0UN93ZZ, 0UN94ZZ, 0UN97ZZ, 0UN98ZZ,  
0UNC0ZZ, 0UNC3ZZ, 0UNC4ZZ, 0UNC7ZZ, 0UNC8ZZ, 0UNF0ZZ,  
0UNF3ZZ, 0UNF4ZZ, 0UNF7ZZ, 0UNF8ZZ, 0UNG0ZZ, 0UNG3ZZ,  
0UNG4ZZ, 0UNG7ZZ, 0UNG8ZZ, 0UNGXZZ, 0UNJ0ZZ, 0UNJXZZ,  
0UNK0ZZ, 0UNK3ZZ, 0UNK4ZZ, 0UNK7ZZ, 0UNK8ZZ, 0UNKXZZ,  
0UNL0ZZ, 0UNLXZZ, 0UNM0ZZ, 0UNMXZZ, 0UPD00Z, 0UPD01Z,  
0UPD03Z, 0UPD07Z, 0UPD0CZ, 0UPD0DZ, 0UPD0HZ, 0UPD0JZ,  
0UPD0KZ, 0UPD0YZ, 0UPD30Z, 0UPD31Z, 0UPD33Z, 0UPD37Z,

**Appendix**  
**Change in Gender on Record and Transgender Adults' Mental or Behavioral Health**  
**Yee et al.**

0UPD3CZ, 0UPD3DZ, 0UPD3HZ, 0UPD3JZ, 0UPD3KZ, 0UPD3YZ,  
0UPD40Z, 0UPD41Z, 0UPD43Z, 0UPD47Z, 0UPD4CZ, 0UPD4DZ,  
0UPD4HZ, 0UPD4JZ, 0UPD4KZ, 0UPD4YZ, 0UPD70Z, 0UPD71Z,  
0UPD73Z, 0UPD77Z, 0UPD7CZ, 0UPD7DZ, 0UPD7HZ, 0UPD7JZ,  
0UPD7KZ, 0UPD7YZ, 0UPD80Z, 0UPD81Z, 0UPD83Z, 0UPD87Z,  
0UPD8CZ, 0UPD8DZ, 0UPD8HZ, 0UPD8JZ, 0UPD8KZ, 0UPD8YZ,  
0UPDX0Z, 0UPDX3Z, 0UPDXDZ, 0UPDXHZ, 0UPH00Z, 0UPH01Z,  
0UPH03Z, 0UPH07Z, 0UPH0DZ, 0UPH0JZ, 0UPH0KZ, 0UPH0YZ,  
0UPH30Z, 0UPH31Z, 0UPH33Z, 0UPH37Z, 0UPH3DZ, 0UPH3JZ,  
0UPH3KZ, 0UPH3YZ, 0UPH40Z, 0UPH41Z, 0UPH43Z, 0UPH47Z,  
0UPH4DZ, 0UPH4JZ, 0UPH4KZ, 0UPH4YZ, 0UPH70Z, 0UPH71Z,  
0UPH73Z, 0UPH77Z, 0UPH7DZ, 0UPH7JZ, 0UPH7KZ, 0UPH7YZ,  
0UPH80Z, 0UPH81Z, 0UPH83Z, 0UPH87Z, 0UPH8DZ, 0UPH8JZ,  
0UPH8KZ, 0UPH8YZ, 0UPHX0Z, 0UPHX1Z, 0UPHX3Z, 0UPHXDZ,  
0UPM00Z, 0UPM07Z, 0UPM0JZ, 0UPM0KZ, 0UPMX0Z, 0UQ40ZZ,  
0UQ43ZZ, 0UQ44ZZ, 0UQ48ZZ, 0UQ90ZZ, 0UQ93ZZ, 0UQ94ZZ,  
0UQ97ZZ, 0UQ98ZZ, 0UQC0ZZ, 0UQC3ZZ, 0UQC4ZZ, 0UQC7ZZ,  
0UQC8ZZ, 0UQF0ZZ, 0UQF3ZZ, 0UQF4ZZ, 0UQF7ZZ, 0UQF8ZZ,  
0UQG0ZZ, 0UQG3ZZ, 0UQG4ZZ, 0UQG7ZZ, 0UQG8ZZ, 0UQGXZZ,  
0UQJ0ZZ, 0UQJXZZ, 0UQK0ZZ, 0UQK3ZZ, 0UQK4ZZ, 0UQK7ZZ,  
0UQK8ZZ, 0UQKXZZ, 0UQL0ZZ, 0UQLXZZ, 0UQM0ZZ, 0UQMXZZ,  
0US40ZZ, 0US44ZZ, 0US48ZZ, 0US90ZZ, 0US94ZZ, 0US97ZZ, 0US98ZZ,  
0US9XZZ, 0USC0ZZ, 0USC4ZZ, 0USC8ZZ, 0USF0ZZ, 0USF4ZZ,  
0USF8ZZ, 0USG0ZZ, 0USG4ZZ, 0USG7ZZ, 0USG8ZZ, 0USGXZZ,  
0UT40ZZ, 0UT44ZZ, 0UT47ZZ, 0UT48ZZ, 0UT90ZL, 0UT90ZZ, 0UT94ZL,  
0UT94ZZ, 0UT97ZL, 0UT97ZZ, 0UT98ZL, 0UT98ZZ, 0UT9FZL, 0UT9FZZ,  
0UTC0ZZ, 0UTC4ZZ, 0UTC7ZZ, 0UTC8ZZ, 0UTF0ZZ, 0UTF4ZZ,  
0UTF7ZZ, 0UTF8ZZ, 0UTG0ZZ, 0UTG4ZZ, 0UTG7ZZ, 0UTG8ZZ,  
0UTJ0ZZ, 0UTJXZZ, 0UTK0ZZ, 0UTK4ZZ, 0UTK7ZZ, 0UTK8ZZ,  
0UTKXZZ, 0UTL0ZZ, 0UTLXZZ, 0UTM0ZZ, 0UTMXZZ, 0UU407Z,  
0UU40JZ, 0UU40KZ, 0UU447Z, 0UU44JZ, 0UU44KZ, 0UUF07Z, 0UUF0JZ,  
0UUF0KZ, 0UUF47Z, 0UUF4JZ, 0UUF4KZ, 0UUF77Z, 0UUF7JZ,  
0UUF7KZ, 0UUF87Z, 0UUF8JZ, 0UUF8KZ, 0UUJ07Z, 0UUJ0JZ,  
0UUJ0KZ, 0UUJX7Z, 0UUJXJZ, 0UUJXKZ, 0UUK07Z, 0UUK0JZ,  
0UUK0KZ, 0UUK47Z, 0UUK4JZ, 0UUK4KZ, 0UUK77Z, 0UUK7JZ,  
0UUK7KZ, 0UUK87Z, 0UUK8JZ, 0UUK8KZ, 0UUKX7Z, 0UUKXJZ,  
0UUKXKZ, 0UUM07Z, 0UUM0JZ, 0UUM0KZ, 0UUMX7Z, 0UUMXJZ,  
0UUMXKZ, 0UVC0CZ, 0UVC0DZ, 0UVC0ZZ, 0UVC3CZ, 0UVC3DZ,  
0UVC3ZZ, 0UVC4CZ, 0UVC4DZ, 0UVC4ZZ, 0UVC7DZ, 0UVC7ZZ,  
0UVC8DZ, 0UVC8ZZ, 0UY90Z0, 0UY90Z1, 0UY90Z2, 0W2NX0Z,  
0W2NXYZ, 0W3N0ZZ, 0W3N3ZZ, 0W3N4ZZ, 0W8NXZZ, 0W9N00Z,  
0W9N0ZX, 0W9N0ZZ, 0W9N30Z, 0W9N3ZX, 0W9N3ZZ, 0W9N40Z,  
0W9N4ZZ, 0WBN0ZX, 0WBN0ZZ, 0WBN3ZX, 0WBN3ZZ, 0WBN4ZX,  
0WBN4ZZ, 0WBNXZX, 0WBNXZZ, 0WHN03Z, 0WHN0YZ, 0WHN33Z,  
0WHN3YZ, 0WHN43Z, 0WHN4YZ, 0WMN0ZZ, 0WPN00Z, 0WPN01Z,  
0WPN03Z, 0WPN07Z, 0WPN0JZ, 0WPN0KZ, 0WPN0YZ, 0WPN30Z,

**Appendix**  
**Change in Gender on Record and Transgender Adults' Mental or Behavioral Health**  
**Yee et al.**

0WPN31Z, 0WPN33Z, 0WPN37Z, 0WPN3JZ, 0WPN3KZ, 0WPN3YZ, 0WPN40Z, 0WPN41Z, 0WPN43Z, 0WPN47Z, 0WPN4JZ, 0WPN4KZ, 0WPN4YZ, 0WPNX0Z, 0WPNX1Z, 0WPNX3Z, 0WPNX7Z, 0WPNXJZ, 0WPNXKZ, 0WPNXYZ, 0WQN0ZZ, 0WQN3ZZ, 0WQN4ZZ, 0WQNXZZ, 0WUN07Z, 0WUN0JZ, 0WUN0KZ, 0WUN47Z, 0WUN4JZ, 0WUN4KZ, 2Y04X5Z, 2Y44X5Z, 2Y54X5Z, 3E0P05Z, 3E0P304, 3E0P305, 3E0P30M, 3E0P328, 3E0P329, 3E0P33Z, 3E0P35Z, 3E0P36Z, 3E0P37Z, 3E0P3BZ, 3E0P3GC, 3E0P3HZ, 3E0P3KZ, 3E0P3NZ, 3E0P3Q0, 3E0P3Q1, 3E0P3SF, 3E0P3TZ, 3E0P3VZ, 3E0P45Z, 3E0P4GC, 3E0P704, 3E0P705, 3E0P70M, 3E0P728, 3E0P729, 3E0P73Z, 3E0P76Z, 3E0P77Z, 3E0P7BZ, 3E0P7GC, 3E0P7HZ, 3E0P7KZ, 3E0P7NZ, 3E0P7Q0, 3E0P7Q1, 3E0P7SF, 3E0P7TZ, 3E0P7VZ, 3E0P804, 3E0P805, 3E0P80M, 3E0P828, 3E0P829, 3E0P83Z, 3E0P86Z, 3E0P87Z, 3E0P8BZ, 3E0P8GC, 3E0P8HZ, 3E0P8KZ, 3E0P8NZ, 3E0P8SF, 3E0P8TZ, 3E1P38X, 3E1P38Z, 3E1P78X, 3E1P78Z, 3E1P88X, 3E1P88Z, 8E0HX62, 8E0UXY7, BU060ZZ, BU061ZZ, BU06YZZ, BU090ZZ, BU091ZZ, BU09YZZ, BU160ZZ, BU161ZZ, BU16YZZ, BU16ZZZ, BU190ZZ, BU191ZZ, BU19YZZ, BU19ZZZ, BU36Y0Z, BU36YZZ, BU36ZZZ, BU39Y0Z, BU39YZZ, BU39ZZZ, BU46YZZ, BU46ZZZ, DU010ZZ, DU011ZZ, DU012ZZ, DU013Z0, DU013ZZ, DU014ZZ, DU015ZZ, DU016ZZ, DU020ZZ, DU021ZZ, DU022ZZ, DU023Z0, DU023ZZ, DU024ZZ, DU025ZZ, DU026ZZ, DU1197Z, DU1198Z, DU1199Z, DU119BZ, DU119CZ, DU119YZ, DU11B7Z, DU11B8Z, DU11B9Z, DU11BBZ, DU11BCZ, DU11BYZ, DU1297Z, DU1298Z, DU1299Z, DU129BZ, DU129CZ, DU129YZ, DU12B7Z, DU12B8Z, DU12B9Z, DU12BBZ, DU12BCZ, DU12BYZ, DU21DZZ, DU21HZZ, DU21JZZ, DU22DZZ, DU22HZZ, DU22JZZ, DUY17ZZ, DUY18ZZ, DUY1CZZ, DUY1FZZ, DUY27ZZ, DUY28ZZ, DUY2CZZ, DUY2FZZ

**Additional male sex-specific care**

**CPT/HCPCS** 0096U, 3267F, 3268F, 55000, 55040, 55041, 55060, 55400, 55540, 55680, 55874, 55899, 76870, 89335, 00920, 00924, 00926, 00928, 00930, 00932, 00934, 00936

**ICD9CM** 2572, 6083, 6039, 6071, 6079, 4564, 605, 6073, 75251, 60785, 60783, 6078, 60789, 60889, 60784, 6084, 9224, 6088, 6089

**ICD10CM** A1815, A5423, A6001, A6002, B260, B3742, C50021, C50022, C50029, C50121, C50122, C50129, C50221, C50222, C50229, C50321, C50322, C50329, C50421, C50422, C50429, C50521, C50522, C50529, C50621, C50622, C50629, C50821, C50822, C50829, C50921, C50922, C50929, C600, C601, C602, C608, C609, C6200, C6201, C6202, C6210, C6211, C6212, C6290, C6291, C6292, C632, C637, C638, C639, D074, D0760, D0761, D0769, D290, D2920, D2921, D2922, D294, D298, D299, D4010, D4011, D4012, D408, D409, E290, E291, E298, E299, E895, F5221, F5232, I861, L291, N430, N431, N432, N433, N4400, N4403, N441, N442, N448, N452, N471, N472, N473, N474, N475, N476, N477, N478, N480, N481, N4821, N4822, N4829, N4830, N4831, N4832, N4833, N4839, N485, N486, N4881, N4882, N4883, N492, N493, N498, N500, N501, N50811, N50812, N50819,

**Appendix**  
**Change in Gender on Record and Transgender Adults' Mental or Behavioral Health**  
**Yee et al.**

N5082, N5201, N5202, N5203, N521, N5232, N5233, N5235, N5236, N5313, N5319, N538, N539, N99110, N99111, N99112, N99113, N99114, N99115, N99116, P835, Q5300, Q5301, Q5302, Q5310, Q53111, Q53112, Q5312, Q5313, Q5320, Q53211, Q53212, Q5322, Q5323, Q539, Q540, Q541, Q542, Q543, Q544, Q548, Q549, Q550, Q551, Q5520, Q5521, Q5522, Q5523, Q5529, Q555, Q5561, Q5562, Q5563, Q5564, Q5569, Q557, Q558, Q559, Q561, Q980, Q981, Q983, Q984, Q986, Q987, Q988, Q989, R3983, R3984, R860, R861, R862, R863, R864, R865, R866, R867, R868, R869, R93811, R93812, R93813, R93819, S30201A, S30201D, S30201S, S3021XA, S3021XD, S3021XS, S3022XA, S3022XD, S3022XS, S30812A, S30812D, S30812S, S30813A, S30813D, S30813S, S30815A, S30815D, S30815S, S30822A, S30822D, S30822S, S30823A, S30823D, S30823S, S30825A, S30825D, S30825S, S30842A, S30842D, S30842S, S30843A, S30843D, S30843S, S30845A, S30845D, S30845S, S30852A, S30852D, S30852S, S30853A, S30853D, S30853S, S30855A, S30855D, S30855S, S30862A, S30862D, S30862S, S30863A, S30863D, S30863S, S30865A, S30865D, S30865S, S30872A, S30872D, S30872S, S30873A, S30873D, S30873S, S30875A, S30875D, S30875S, S3094XA, S3094XD, S3094XS, S3121XA, S3121XD, S3121XS, S3122XA, S3122XD, S3122XS, S3123XA, S3123XD, S3123XS, S3124XA, S3124XD, S3124XS, S3125XA, S3125XD, S3125XS, S3130XA, S3130XD, S3130XS, S3131XA, S3131XD, S3131XS, S3132XA, S3132XD, S3132XS, S3133XA, S3133XD, S3133XS, S3134XA, S3134XD, S3134XS, S3135XA, S3135XD, S3135XS, S31501A, S31501D, S31501S, S31511A, S31511D, S31511S, S31521A, S31521D, S31521S, S31531A, S31531D, S31531S, S31541A, S31541D, S31541S, S31551A, S31551D, S31551S, S38001A, S38001D, S38001S, S3801XA, S3801XD, S3801XS, S3802XA, S3802XD, S3802XS, S38221A, S38221D, S38221S, S38222A, S38222D, S38222S, S38231A, S38231D, S38231S, S38232A, S38232D, S38232S, S39840A, S39840D, S39840S, T194XXA, T194XXD, T194XXS, T2106XA, T2106XD, T2106XS, T2116XA, T2116XD, T2116XS, T2126XA, T2126XD, T2126XS, T2136XA, T2136XD, T2136XS, T2146XA, T2146XD, T2146XS, T2156XA, T2156XD, T2156XS, T2166XA, T2166XD, T2166XS, T2176XA, T2176XD, T2176XS, Z1271, Z31440, Z31448, Z412, Z8545, Z8547, Z8549, Z87710, N5089, N5239, N528, N529, N522, N4889, N489, N499, Z87438

ICD10PCS 0V28X0Z, 0V28XYZ, 0V2DX0Z, 0V2DXYZ, 0V2SX0Z, 0V2SXYZ, 0V550ZZ, 0V553ZZ, 0V554ZZ, 0V55XZZ, 0V560ZZ, 0V563ZZ, 0V564ZZ, 0V570ZZ, 0V573ZZ, 0V574ZZ, 0V590ZZ, 0V593ZZ, 0V594ZZ, 0V5B0ZZ, 0V5B3ZZ, 0V5B4ZZ, 0V5C0ZZ, 0V5C3ZZ, 0V5C4ZZ, 0V5S0ZZ, 0V5S3ZZ, 0V5S4ZZ, 0V5SXZZ, 0V5T0ZZ, 0V5T3ZZ, 0V5T4ZZ, 0V5TXZZ, 0V9500Z, 0V950ZX, 0V950ZZ, 0V9530Z, 0V953ZX, 0V953ZZ, 0V9540Z, 0V954ZX, 0V954ZZ, 0V95X0Z, 0V95XZX, 0V95XZZ, 0V9600Z, 0V960ZX, 0V960ZZ, 0V9630Z, 0V963ZX, 0V963ZZ, 0V9640Z, 0V964ZX, 0V964ZZ, 0V9700Z, 0V970ZX, 0V970ZZ, 0V9730Z, 0V973ZX, 0V973ZZ, 0V9740Z, 0V974ZX, 0V974ZZ, 0V9900Z, 0V990ZX, 0V990ZZ, 0V9930Z, 0V993ZX, 0V993ZZ, 0V9940Z, 0V994ZX, 0V994ZZ, 0V9B00Z, 0V9B0ZX, 0V9B0ZZ, 0V9B30Z,

**Appendix**  
**Change in Gender on Record and Transgender Adults' Mental or Behavioral Health**  
**Yee et al.**

---

0V9B3ZX, 0V9B3ZZ, 0V9B40Z, 0V9B4ZX, 0V9B4ZZ, 0V9C00Z,  
0V9C0ZX, 0V9C0ZZ, 0V9C30Z, 0V9C3ZX, 0V9C3ZZ, 0V9C40Z,  
0V9C4ZX, 0V9C4ZZ, 0V9S00Z, 0V9S0ZX, 0V9S0ZZ, 0V9S30Z, 0V9S3ZX,  
0V9S3ZZ, 0V9S40Z, 0V9S4ZX, 0V9S4ZZ, 0V9SX0Z, 0V9SXZX,  
0V9SXZZ, 0V9T00Z, 0V9T0ZX, 0V9T0ZZ, 0V9T30Z, 0V9T3ZX, 0V9T3ZZ,  
0V9T40Z, 0V9T4ZX, 0V9T4ZZ, 0V9TX0Z, 0V9TXZX, 0V9TXZZ,  
0VB50ZX, 0VB50ZZ, 0VB53ZX, 0VB53ZZ, 0VB54ZX, 0VB54ZZ,  
0VB5XZX, 0VB5XZZ, 0VB60ZX, 0VB60ZZ, 0VB63ZX, 0VB63ZZ,  
0VB64ZX, 0VB64ZZ, 0VB70ZX, 0VB70ZZ, 0VB73ZX, 0VB73ZZ,  
0VB74ZX, 0VB74ZZ, 0VB90ZX, 0VB90ZZ, 0VB93ZX, 0VB93ZZ,  
0VB94ZX, 0VB94ZZ, 0VBB0ZX, 0VBB0ZZ, 0VBB3ZX, 0VBB3ZZ,  
0VBB4ZX, 0VBB4ZZ, 0VBC0ZX, 0VBC0ZZ, 0VBC3ZX, 0VBC3ZZ,  
0VBC4ZX, 0VBC4ZZ, 0VBS0ZX, 0VBS0ZZ, 0VBS3ZX, 0VBS3ZZ,  
0VBS4ZX, 0VBS4ZZ, 0VBSXZX, 0VBSXZZ, 0VBT0ZX, 0VBT0ZZ,  
0VBT3ZX, 0VBT3ZZ, 0VBT4ZX, 0VBT4ZZ, 0VBTXZX, 0VBTXZZ,  
0VC50ZZ, 0VC53ZZ, 0VC54ZZ, 0VC5XZZ, 0VC60ZZ, 0VC63ZZ,  
0VC64ZZ, 0VC70ZZ, 0VC73ZZ, 0VC74ZZ, 0VC90ZZ, 0VC93ZZ,  
0VC94ZZ, 0VCB0ZZ, 0VCB3ZZ, 0VCB4ZZ, 0VCC0ZZ, 0VCC3ZZ,  
0VCC4ZZ, 0VCS0ZZ, 0VCS3ZZ, 0VCS4ZZ, 0VCSXZZ, 0VCT0ZZ,  
0VCT3ZZ, 0VCT4ZZ, 0VCTXZZ, 0VH803Z, 0VH80YZ, 0VH833Z,  
0VH83YZ, 0VH843Z, 0VH84YZ, 0VH873Z, 0VH87YZ, 0VH883Z,  
0VH88YZ, 0VHD03Z, 0VHD0YZ, 0VHD33Z, 0VHD3YZ, 0VHD43Z,  
0VHD4YZ, 0VHD73Z, 0VHD7YZ, 0VHD83Z, 0VHD8YZ, 0VHS03Z,  
0VHS0YZ, 0VHS33Z, 0VHS3YZ, 0VHS43Z, 0VHS4YZ, 0VHS7YZ,  
0VHS8YZ, 0VHSX3Z, 0VJ80ZZ, 0VJ83ZZ, 0VJ84ZZ, 0VJ8XZZ, 0VJD0ZZ,  
0VJD3ZZ, 0VJD4ZZ, 0VJDXZZ, 0VM5XZZ, 0VM60ZZ, 0VM64ZZ,  
0VM70ZZ, 0VM74ZZ, 0VM90ZZ, 0VM94ZZ, 0VMB0ZZ, 0VMB4ZZ,  
0VMC0ZZ, 0VMC4ZZ, 0VMSXZZ, 0VN50ZZ, 0VN53ZZ, 0VN54ZZ,  
0VN5XZZ, 0VN60ZZ, 0VN63ZZ, 0VN64ZZ, 0VN70ZZ, 0VN73ZZ,  
0VN74ZZ, 0VN90ZZ, 0VN93ZZ, 0VN94ZZ, 0VNB0ZZ, 0VNB3ZZ,  
0VNB4ZZ, 0VNC0ZZ, 0VNC3ZZ, 0VNC4ZZ, 0VNS0ZZ, 0VNS3ZZ,  
0VNS4ZZ, 0VNSXZZ, 0VNT0ZZ, 0VNT3ZZ, 0VNT4ZZ, 0VNTXZZ,  
0VP800Z, 0VP803Z, 0VP807Z, 0VP80JZ, 0VP80KZ, 0VP80YZ, 0VP830Z,  
0VP833Z, 0VP837Z, 0VP83JZ, 0VP83KZ, 0VP83YZ, 0VP840Z, 0VP843Z,  
0VP847Z, 0VP84JZ, 0VP84KZ, 0VP84YZ, 0VP870Z, 0VP873Z, 0VP877Z,  
0VP87JZ, 0VP87KZ, 0VP87YZ, 0VP880Z, 0VP883Z, 0VP887Z, 0VP88JZ,  
0VP88KZ, 0VP88YZ, 0VP8X0Z, 0VP8X3Z, 0VPD00Z, 0VPD03Z,  
0VPD07Z, 0VPD0JZ, 0VPD0KZ, 0VPD0YZ, 0VPD30Z, 0VPD33Z,  
0VPD37Z, 0VPD3JZ, 0VPD3KZ, 0VPD3YZ, 0VPD40Z, 0VPD43Z,  
0VPD47Z, 0VPD4JZ, 0VPD4KZ, 0VPD4YZ, 0VPD70Z, 0VPD73Z,  
0VPD77Z, 0VPD7JZ, 0VPD7KZ, 0VPD7YZ, 0VPD80Z, 0VPD83Z,  
0VPD87Z, 0VPD8JZ, 0VPD8KZ, 0VPD8YZ, 0VPDX0Z, 0VPDX3Z,  
0VPS00Z, 0VPS03Z, 0VPS07Z, 0VPS0JZ, 0VPS0KZ, 0VPS0YZ, 0VPS30Z,  
0VPS33Z, 0VPS37Z, 0VPS3JZ, 0VPS3KZ, 0VPS3YZ, 0VPS40Z, 0VPS43Z,  
0VPS47Z, 0VPS4JZ, 0VPS4KZ, 0VPS4YZ, 0VPS70Z, 0VPS73Z, 0VPS77Z,  
0VPS7JZ, 0VPS7KZ, 0VPS7YZ, 0VPS80Z, 0VPS83Z, 0VPS87Z, 0VPS8JZ,

---



**Appendix**  
**Change in Gender on Record and Transgender Adults' Mental or Behavioral Health**  
**Yee et al.**

---

0VPS8KZ, 0VPS8YZ, 0VPSX0Z, 0VPSX3Z, 0VQ50ZZ, 0VQ53ZZ,  
0VQ54ZZ, 0VQ5XZZ, 0VQ60ZZ, 0VQ63ZZ, 0VQ64ZZ, 0VQ70ZZ,  
0VQ73ZZ, 0VQ74ZZ, 0VQ90ZZ, 0VQ93ZZ, 0VQ94ZZ, 0VQB0ZZ,  
0VQB3ZZ, 0VQB4ZZ, 0VQC0ZZ, 0VQC3ZZ, 0VQC4ZZ, 0VQS0ZZ,  
0VQS3ZZ, 0VQS4ZZ, 0VQSXZZ, 0VQT0ZZ, 0VQT3ZZ, 0VQT4ZZ,  
0VQTXZZ, 0VS90ZZ, 0VS93ZZ, 0VS94ZZ, 0VS98ZZ, 0VSB0ZZ,  
0VSB3ZZ, 0VSB4ZZ, 0VSB8ZZ, 0VSC0ZZ, 0VSC3ZZ, 0VSC4ZZ,  
0VSC8ZZ, 0VT50ZZ, 0VT54ZZ, 0VT5XZZ, 0VT60ZZ, 0VT64ZZ,  
0VT70ZZ, 0VT74ZZ, 0VT90ZZ, 0VT94ZZ, 0VTB0ZZ, 0VTB4ZZ,  
0VTC0ZZ, 0VTC4ZZ, 0VTS0ZZ, 0VTS4ZZ, 0VTSXZZ, 0VTT0ZZ,  
0VTT4ZZ, 0VTTXZZ, 0VU607Z, 0VU60JZ, 0VU60KZ, 0VU647Z,  
0VU64JZ, 0VU64KZ, 0VU687Z, 0VU68JZ, 0VU68KZ, 0VU707Z, 0VU70JZ,  
0VU70KZ, 0VU747Z, 0VU74JZ, 0VU74KZ, 0VU787Z, 0VU78JZ,  
0VU78KZ, 0VW800Z, 0VW803Z, 0VW807Z, 0VW80JZ, 0VW80KZ,  
0VW80YZ, 0VW830Z, 0VW833Z, 0VW837Z, 0VW83JZ, 0VW83KZ,  
0VW83YZ, 0VW840Z, 0VW843Z, 0VW847Z, 0VW84JZ, 0VW84KZ,  
0VW84YZ, 0VW870Z, 0VW873Z, 0VW877Z, 0VW87JZ, 0VW87KZ,  
0VW87YZ, 0VW880Z, 0VW883Z, 0VW887Z, 0VW88JZ, 0VW88KZ,  
0VW88YZ, 0VW8X0Z, 0VW8X3Z, 0VW8X7Z, 0VW8XJZ, 0VW8XKZ,  
0VWD00Z, 0VWD03Z, 0VWD07Z, 0VWD0JZ, 0VWD0KZ, 0VWD0YZ,  
0VWD30Z, 0VWD33Z, 0VWD37Z, 0VWD3JZ, 0VWD3KZ, 0VWD3YZ,  
0VWD40Z, 0VWD43Z, 0VWD47Z, 0VWD4JZ, 0VWD4KZ, 0VWD4YZ,  
0VWD70Z, 0VWD73Z, 0VWD77Z, 0VWD7JZ, 0VWD7KZ, 0VWD7YZ,  
0VWD80Z, 0VWD83Z, 0VWD87Z, 0VWD8JZ, 0VWD8KZ, 0VWD8YZ,  
0VWDX0Z, 0VWDX3Z, 0VWDX7Z, 0VWDXJZ, 0VWDXKZ, 0W9M00Z,  
0W9M0ZX, 0W9M0ZZ, 0W9M30Z, 0W9M3ZX, 0W9M3ZZ, 0W9M40Z,  
0W9M4ZX, 0W9M4ZZ, 0WBM0ZX, 0WBM0ZZ, 0WBM3ZX, 0WBM3ZZ,  
0WBM4ZX, 0WBM4ZZ, 0WBMXZX, 0WBMXZZ, 0WPM00Z, 0WPM01Z,  
0WPM03Z, 0WPM07Z, 0WPM0JZ, 0WPM0KZ, 0WPM0YZ, 0WPM30Z,  
0WPM31Z, 0WPM33Z, 0WPM37Z, 0WPM3JZ, 0WPM3KZ, 0WPM3YZ,  
0WPM40Z, 0WPM41Z, 0WPM43Z, 0WPM47Z, 0WPM4JZ, 0WPM4KZ,  
0WPM4YZ, 0WPMX0Z, 0WPMX1Z, 0WPMX3Z, 0WPMX7Z, 0WPMXJZ,  
0WPMXKZ, 0WPMXYZ, 0WWM00Z, 0WWM01Z, 0WWM03Z,  
0WWM07Z, 0WWM0JZ, 0WWM0KZ, 0WWM0YZ, 0WWM30Z,  
0WWM31Z, 0WWM33Z, 0WWM37Z, 0WWM3JZ, 0WWM3KZ,  
0WWM3YZ, 0WWM40Z, 0WWM41Z, 0WWM43Z, 0WWM47Z,  
0WWM4JZ, 0WWM4KZ, 0WWM4YZ, 0WWMX0Z, 0WWMX1Z,  
0WWMX3Z, 0WWMX7Z, 0WWMXJZ, 0WWMXKZ, 0WWMXYZ,  
3E0N304, 3E0N305, 3E0N30M, 3E0N328, 3E0N329, 3E0N33Z, 3E0N36Z,  
3E0N37Z, 3E0N3BZ, 3E0N3GC, 3E0N3HZ, 3E0N3KZ, 3E0N3NZ,  
3E0N3SF, 3E0N3TZ, 3E0N4GC, 3E0N704, 3E0N705, 3E0N70M, 3E0N728,  
3E0N729, 3E0N73Z, 3E0N76Z, 3E0N77Z, 3E0N7BZ, 3E0N7GC, 3E0N7HZ,  
3E0N7KZ, 3E0N7NZ, 3E0N7SF, 3E0N7TZ, 3E0N804, 3E0N805, 3E0N80M,  
3E0N828, 3E0N829, 3E0N83Z, 3E0N86Z, 3E0N87Z, 3E0N8BZ, 3E0N8GC,  
3E0N8HZ, 3E0N8KZ, 3E0N8NZ, 3E0N8SF, 3E0N8TZ, 3E1N38X, 3E1N38Z,  
3E1N78X, 3E1N78Z, 3E1N88X, 3E1N88Z, BV000ZZ, BV001ZZ, BV00YZZ,

---

**Appendix**  
**Change in Gender on Record and Transgender Adults' Mental or Behavioral Health**  
**Yee et al.**

---

BV050ZZ, BV051ZZ, BV05YZZ, BV060ZZ, BV061ZZ, BV06YZZ,  
BV080ZZ, BV081ZZ, BV08YZZ, BV100ZZ, BV101ZZ, BV10YZZ,  
BV10ZZZ, BV180ZZ, BV181ZZ, BV18YZZ, BV18ZZZ, BV30Y0Z,  
BV30YZZ, BV30ZZZ, BV34Y0Z, BV34YZZ, BV34ZZZ, BV35Y0Z,  
BV35YZZ, BV35ZZZ, BV36Y0Z, BV36YZZ, BV36ZZZ, BV37Y0Z,  
BV37YZZ, BV37ZZZ, BV44ZZZ, BV4BZZZ, CV191ZZ, CV19YZZ,  
CV1YYZZ, DV010ZZ, DV011ZZ, DV012ZZ, DV013Z0, DV013ZZ,  
DV014ZZ, DV015ZZ, DV016ZZ, DV1197Z, DV1198Z, DV1199Z,  
DV119BZ, DV119CZ, DV119YZ, DV11B7Z, DV11B8Z, DV11B9Z,  
DV11BBZ, DV11BCZ, DV11BYZ, DV21DZZ, DV21HZZ, DV21JZZ,  
DVY17ZZ, DVY18ZZ, DVY1FZZ

---

**Appendix**  
**Change in Gender on Record and Transgender Adults' Mental or Behavioral Health**  
**Yee et al.**

**Appendix Table 2.** Gender-Affirming Surgeries Procedure Codes

| Code system                                                                                          | Codes                                                                                                                                                                                                                                                                                                                                                                                                                                    |
|------------------------------------------------------------------------------------------------------|------------------------------------------------------------------------------------------------------------------------------------------------------------------------------------------------------------------------------------------------------------------------------------------------------------------------------------------------------------------------------------------------------------------------------------------|
| <b>Masculinizing surgery (for use in female sex assigned at birth individuals): phalloplasty</b>     |                                                                                                                                                                                                                                                                                                                                                                                                                                          |
| CPT/HCPCS                                                                                            | 00938, 54400, 54401, 54405, 55110, 55899, 55980, 54300, 54328, 54332, 54336, 54352, 54380, 54385, 54390, 54406, 54408, 54410, 54411, 54415, 54416, 54417, 54430, 54435, 54440, C1813, C2622                                                                                                                                                                                                                                              |
| ICD9PCS                                                                                              | 6443, 6444, 6495, 6497, 99639                                                                                                                                                                                                                                                                                                                                                                                                            |
| ICD10PCS                                                                                             | 0VUS07Z, 0VUS0JZ, 0VUS0KZ, 0VUS47Z, 0VUS4JZ, 0VUS4KZ, 0VUSX7Z, 0VUSXJZ, 0VUSXKZ, 0W4N071, 0W4N0J1, 0W4N0K1, 0W4N0Z1, T83410A, T83420A, T83490A, Z9071                                                                                                                                                                                                                                                                                    |
| <b>Feminizing surgery (for use in male sex assigned at birth individuals): vaginoplasty</b>          |                                                                                                                                                                                                                                                                                                                                                                                                                                          |
| CPT/HCPCS                                                                                            | 56800, 57291, 57292, 57295, 57296, 57335, 57426, 57400                                                                                                                                                                                                                                                                                                                                                                                   |
| ICD9PCS                                                                                              | 706, 7061, 7061, 7062, 7063, 7064                                                                                                                                                                                                                                                                                                                                                                                                        |
| ICD10PCS                                                                                             | 0UUG07Z, 0UUG0JZ, 0UUG0KZ, 0UUG47Z, 0UUG4JZ, 0UUG4KZ, 0UUG77Z, 0UUG7JZ, 0UUG7KZ, 0UUG87Z, 0UUG8JZ, 0UUG8KZ, 0UUGX7Z, 0UUGXJZ, 0UUGXKZ, 0W4M070, 0W4M0J0, 0W4M0K0, 0W4M0Z0                                                                                                                                                                                                                                                                |
| <b>Urethroplasty (for use in all individuals)</b>                                                    |                                                                                                                                                                                                                                                                                                                                                                                                                                          |
| CPT/HCPCS                                                                                            | 51102, 52000, 53400, 53405, 53420, 53425, 53430, 53899, 57311, 53215, 53410, 53415, 53431, 53505, 53510, 53515, 53520, 53600, 53601, 53605, 53620, 53621, 54308, 54312, 54316, 54318, 54322, 54324, 54326, 54340, 54344, 54348, 57220, 57230                                                                                                                                                                                             |
| <b>Masculinizing surgery (for use in female sex assigned at birth individuals), non-phalloplasty</b> |                                                                                                                                                                                                                                                                                                                                                                                                                                          |
| CPT/HCPCS                                                                                            | 15756, 15757, 15758, 19301, 19302, 19303, 19304, 19318, 20970, 20972, 54660, 55120, 55175, 55180, 57106, 57110, 57120, 19300, 51925, 57107, 57109, 57111, 57112, 57700, 57720, 00846, 00906, L8699                                                                                                                                                                                                                                       |
| ICD9PCS                                                                                              | 627, 6501, 6509, 6531, 6539, 6541, 6549, 6551, 6552, 6553, 6554, 6561, 6562, 6563, 6564, 6651, 674, 683, 6831, 6839, 684, 6841, 6849, 685, 6851, 6859, 686, 6861, 6869, 687, 6871, 6879, 689, 704, 7162, 7162, 852, 8523, 8531, 8532, 8534, 8536, 8541, 8542, 8543, 8544, 8545, 8546, 8547, 8548, 8586, 8587                                                                                                                             |
| ICD10PCS                                                                                             | 07T50ZZ, 07T60ZZ, 07T70ZZ, 07T80ZZ, 07T90ZZ, 0H5T0ZZ, 0H5T3ZZ, 0H5T7ZZ, 0H5T8ZZ, 0H5TXZZ, 0H5U0ZZ, 0H5U3ZZ, 0H5U7ZZ, 0H5U8ZZ, 0H5UXZZ, 0H5V0ZZ, 0H5V3ZZ, 0H5V7ZZ, 0H5V8ZZ, 0H5VXZZ, 0HBV0ZZ, 0HBV3ZZ, 0HBV7ZZ, 0HBV8ZZ, 0HBVXZZ, 0HMXZZ, 0HMXZZ, 0HSWXZZ, 0HSXXZZ, 0HTT0ZZ, 0HTU0ZZ, 0HTV0ZZ, 0UT92ZL, 0VR90JZ, 0VRB0JZ, 0VRC0JZ, 0VU907Z, 0VU90JZ, 0VU90KZ, 0VUB07Z, 0VUB0JZ, 0VUB0KZ, 0VUC07Z, 0VUC0JZ, 0VUC0KZ, Z9072, Z90721, Z90722 |
| <b>Feminizing surgery (for use in male sex assigned at birth individuals), non-vaginoplasty</b>      |                                                                                                                                                                                                                                                                                                                                                                                                                                          |
| CPT/HCPCS                                                                                            | 19324, 19325, 19340, 19342, 19357, 19366, 52601, 54125, 54520, 54690, 55970, 54120, 54130, 54135, 54522, 54530, 54535, 55150, C1789, L8000, L8001, L8002, L8010, L8015, L8020, L8030, L8031, L8035, L8039                                                                                                                                                                                                                                |

**Appendix**  
**Change in Gender on Record and Transgender Adults' Mental or Behavioral Health**  
**Yee et al.**

|          |                                                                                                                                                                                                                                                                                                                                                                                                                                                                                                                                                                                                                                                                                                                                                                                                                                                                                                                                                                                                 |
|----------|-------------------------------------------------------------------------------------------------------------------------------------------------------------------------------------------------------------------------------------------------------------------------------------------------------------------------------------------------------------------------------------------------------------------------------------------------------------------------------------------------------------------------------------------------------------------------------------------------------------------------------------------------------------------------------------------------------------------------------------------------------------------------------------------------------------------------------------------------------------------------------------------------------------------------------------------------------------------------------------------------|
| ICD9PCS  | 3199, 623, 6241, 6242, 643, 645, 7641, 7642, 7643, 7644, 7645, 7646, 7661, 7662, 7663, 7664, 7665, 7666, 7667, 7668, 7669, 855, 8550, 8551, 8552, 8553, 8554, 8555, 8559, 8589, 8595, 8596, 8682, 87, 871, 872, 873, 874, 881, 882, 883, 884, 885, 886, 887, 889, V524                                                                                                                                                                                                                                                                                                                                                                                                                                                                                                                                                                                                                                                                                                                          |
| ICD10PCS | 0H0T07Z, 0H0T0JZ, 0H0T0KZ, 0H0T37Z, 0H0T3JZ, 0H0T3KZ, 0H0T3ZZ, 0H0TX7Z, 0H0TXJZ, 0H0TXKZ, 0H0U07Z, 0H0U0JZ, 0H0U0KZ, 0H0U37Z, 0H0U3JZ, 0H0U3KZ, 0H0UX7Z, 0H0UXJZ, 0H0UXKZ, 0H0V07Z, 0H0V0JZ, 0H0V0KZ, 0H0V37Z, 0H0V3JZ, 0H0V3KZ, 0H0VX7Z, 0H0VXJZ, 0H0VXKZ, 0HRT07Z, 0HRT0JZ, 0HRT0KZ, 0HRT37Z, 0HRT3JZ, 0HRT3KZ, 0HRT3KZ, 0HRTX7Z, 0HRTXJZ, 0HRTXKZ, 0HRU07Z, 0HRU0JZ, 0HRU0JZ, 0HRU0KZ, 0HRU37Z, 0HRU3JZ, 0HRU3KZ, 0HRUX7Z, 0HRUXJZ, 0HRUXKZ, 0HRV07Z, 0HRV0JZ, 0HRV0KZ, 0HRV37Z, 0HRV3JZ, 0HRV3KZ, 0HRVX7Z, 0HRVXJZ, 0HRVXKZ, 0HUT07Z, 0HUT0JZ, 0HUT0KZ, 0HUT37Z, 0HUT3JZ, 0HUT3JZ, 0HUT3KZ, 0HUT77Z, 0HUT7JZ, 0HUT7KZ, 0HUT87Z, 0HUT8JZ, 0HUT8KZ, 0HUTX7Z, 0HUTXJZ, 0HUTXKZ, 0HUU07Z, 0HUU0JZ, 0HUU0KZ, 0HUU37Z, 0HUU3JZ, 0HUU3JZ, 0HUU3KZ, 0HUU77Z, 0HUU7JZ, 0HUU7KZ, 0HUU87Z, 0HUU8JZ, 0HUU8KZ, 0HUUX7Z, 0HUUXJZ, 0HUUXKZ, 0HUV07Z, 0HUV0JZ, 0HUV0KZ, 0HUV37Z, 0HUV3JZ, 0HUV3KZ, 0HUV77Z, 0HUV7JZ, 0HUV7KZ, 0HUV87Z, 0HUV8JZ, 0HUV8KZ, 0HUVX7Z, 0HUVXJZ, 0HUVXKZ, 0HRT0JZ, 0HRT0KZ, Z4430 |

**Appendix Table 3.** Gender-Affirming Hormones Drug Names

---

| <b>Feminizing hormones (for use in male sex assigned at birth individuals)</b> |
|--------------------------------------------------------------------------------|
| ALORA                                                                          |
| AMABELZ                                                                        |
| AUROVELA                                                                       |
| BLISOVI 24 FE                                                                  |
| CENESTIN                                                                       |
| CLIMARA                                                                        |
| CLIMARA PRO                                                                    |
| CONJUGATED ESTROGENS                                                           |
| CONJUGATED ESTROGENS AND MEDROXYPROGESTERONE ACETATE                           |
| DELESTROGEN                                                                    |
| DEPO-ESTRADIOL                                                                 |
| DIVIGEL                                                                        |
| DROSPIRENONE AND ETHINYL ESTRADIOL                                             |
| EEMT                                                                           |
| ELESTRIN                                                                       |
| ENJUVIA                                                                        |
| ESTARYLLA                                                                      |
| ESTERIFIED ESTROGENS                                                           |
| ESTERIFIED ESTROGENS AND METHYLTESTOSTERONE                                    |
| ESTRACE                                                                        |
| ESTRADERM (ESTRADIOL) PATCH, EXTENDED RELEASE                                  |
| ESTRADIOL                                                                      |
| ESTRADIOL AND NORETHINDRONE ACETATE                                            |
| ESTRADIOL VALERATE                                                             |
| ESTRASORB                                                                      |
| ESTRING                                                                        |
| ESTROGEL                                                                       |
| ESTROGEN (FOLLICULINUM, OOPHORINUM) LIQUID                                     |
| ESTROGEN PHENOLIC                                                              |
| ESTROGENS, CONJUGATED                                                          |
| ESTROGENS, ESTERIFIED                                                          |
| ESTROGENS, ESTERIFIED AND METHYLTESTOSTERONE                                   |
| ESTROPIPATE                                                                    |
| ESTROSTEP FE                                                                   |
| EVAMIST                                                                        |
| FEMYNOR (NORGESTIMATE AND ETHINYL ESTRADIOL) KIT                               |
| FYAVOLV                                                                        |
| GENERESS                                                                       |
| GIANVI                                                                         |
| GILDESS                                                                        |
| GUNA-BETA-ESTRADIOL (ESTRADIOL) SOLUTION/ DROPS                                |
| HAILEY FE                                                                      |
| IMVEXXY                                                                        |
| INNOFEM (ESTRADIOL) TABLET                                                     |

---

**Appendix**  
**Change in Gender on Record and Transgender Adults' Mental or Behavioral Health**  
**Yee et al.**

JALYN (DUTASTERIDE AND TAMSULOSIN HYDROCHLORIDE) CAPSULE  
JEVANTIQUE LO (NORETHINDRONE ACETATE AND ETHINYL ESTRADIOL)  
TABLET  
JINTELI (NORETHINDRONE ACETATE AND ETHINYL ESTRADIOL) TABLET  
JUNEL  
LARIN  
LO LOESTRIN FE  
LO MINASTRIN FE  
LOESTRIN 24 FE  
LOESTRIN FE  
LOMEDIA 24 FE (NORETHINDRONE ACETATE AND ETHINYL ESTRADIOL) KIT  
LOPREEZA  
MENEST  
MENOSTAR  
MIBELAS  
MICROGESTIN  
MILI  
MINASTRIN  
MINASTRIN 24 FE  
MINIVELLE  
MONO-LINYAH  
MONONESSA  
MONONESSA / TRINESSA (NORGESTIMATE AND ETHINYL ESTRADIOL) KIT  
NORETHINDRONE  
NORETHINDRONE ACETATE  
NORETHINDRONE ACETATE AND ETHINYL ESTRADIOL  
NORETHINDRONE ACETATE AND ETHINYL ESTRADIOL AND FERROUS  
FUMARATE  
NORETHINDRONE ACETATE MICRONIZED  
NORETHISTERONE ACETATE  
NORGESTIMATE  
NORGESTIMATE AND ETHINYL ESTRADIOL  
NORGESTIMATE MICRONIZED  
ORTHO TRI CYCLEN  
ORTHO TRI CYCLEN LO (NORGESTIMATE AND ETHINYL ESTRADIOL) KIT  
PHILITH  
PREFEST- ESTRADIOL/NORGESTIMATE  
PREMARIN  
PREMPHASE  
PREMPRO  
PREVIFEM  
SPRINTEC  
TARINA  
TILIA FE  
TRI FEMYNOR  
TRI-ESTARYLLA

**Appendix**  
**Change in Gender on Record and Transgender Adults' Mental or Behavioral Health**  
**Yee et al.**

TRI-LEGEST FE 28 DAY (NORETHINDRONE ACETATE AND ETHINYL ESTRADIOL) KIT  
TRI-LINYAH  
TRI-LO- ESTARYLLA  
TRI-LO-MARZIA  
TRI-LO-SPRINTEC  
TRI-MILI  
TRINESSA  
TRINESSA LO (NORGESTIMATE AND ETHINYL ESTRADIOL) KIT  
TRI-PREVIFEM  
TRI-SPRINTEC  
VAGIFEM  
VIVELLE-DOT

**Masculinizing hormones (for use in female sex assigned at birth individuals)**

ANDRODERM  
ANDROGEL  
ANDROID - METHYLTESTOSTERONE CAPSULE  
ANDROXY  
AXIRON  
DELATESTRYL- TESTOSTERONE ENANTHATE INJECTION, SOLUTION  
DEPO-TESTOSTERONE  
FLUOXYMESTERONE  
FORTESTA  
NATESTO  
STRIANT  
TESTIM  
TESTOPEL  
TESTOSTERONE  
TESTOSTERONE CYPIONATE  
TESTOSTERONE CYPIONATE  
TESTOSTERONE DECANOATE  
TESTOSTERONE ENANTATE  
TESTOSTERONE ENANTHATE  
TESTOSTERONE EP-USP  
TESTOSTERONE ISOCAPROATE  
TESTOSTERONE PHENYLPROPIONATE  
TESTOSTERONE PROPIONATE  
TESTOSTERONE UNDECANOAT  
TESTOSTERONE UNDECANOATE  
TETSOTERON MICRONIZED  
VOGELXO  
XYOSTED

**Appendix**  
**Change in Gender on Record and Transgender Adults' Mental or Behavioral Health**  
**Yee et al.**

**Appendix Table 4.** Characteristics of the 2010–2019 Oregon Medicaid Transgender and Nonbinary Sample, Including Unknown Sex Assigned at Birth

| Characteristic              | Assigned female sex at birth |                        | Assigned male sex at birth |                          | Unknown sex assigned at birth |                        |
|-----------------------------|------------------------------|------------------------|----------------------------|--------------------------|-------------------------------|------------------------|
|                             | Female gender<br>(N=836)     | Male gender<br>(N=303) | Male gender<br>(N=898)     | Female gender<br>(N=449) | Female gender<br>(N=166)      | Male gender<br>(N=288) |
| Age, years                  |                              |                        |                            |                          |                               |                        |
| 18–25                       | 105 (12.6)                   | 28 (9.2)               | 86 (9.6)                   | 38 (8.5)                 | 17 (10.2)                     | 22 (7.6)               |
| 26–35                       | 546 (65.3)                   | 187 (61.7)             | 502 (55.9)                 | 251 (55.9)               | 116 (69.9)                    | 175 (60.8)             |
| 36–45                       | 129 (15.4)                   | 50 (16.5)              | 169 (18.8)                 | 86 (19.2)                | 18 (10.8)                     | 53 (18.4)              |
| 46–55                       | 37 (4.4)                     | 27 (8.9)               | 94 (10.5)                  | 52 (11.6)                | 11 (6.6)                      | 28 (9.7)               |
| 55–64                       | 19 (2.3)                     | 11 (3.6)               | 47 (5.2)                   | 22 (4.9)                 | 4 (2.4)                       | 10 (3.5)               |
| Race/ethnicity              |                              |                        |                            |                          |                               |                        |
| Non-Hispanic White          | 575 (68.8)                   | 176 (58.1)             | 614 (68.4)                 | 254 (56.6)               | 109 (65.7)                    | 175 (60.8)             |
| Hispanic                    | 61 (7.3)                     | 31 (10.2)              | 55 (6.1)                   | 28 (6.2)                 | 10 (6.0)                      | 16 (5.6)               |
| Other                       | 51 (6.1)                     | 15 (5.0)               | 52 (5.7)                   | 24 (5.3)                 | 9 (5.4)                       | 26 (9.0)               |
| Unknown                     | 149 (17.8)                   | 81 (26.7)              | 177 (19.7)                 | 143 (31.8)               | 38 (22.9)                     | 71 (24.7)              |
| Residence in Portland metro | 521 (62.3)                   | 205 (67.7)             | 540 (60.1)                 | 327 (72.8)               | 105 (63.3)                    | 162 (56.2)             |
| Years enrollment            | 4.00 (2.42–5.92)             | 4.00 (2.42–5.92)       | 3.00 (1.50–4.46)           | 2.58 (1.42–4.75)         | 1.92 (1.17–3.58)              | 2.92 (1.31–4.92)       |

*Notes:* Age represents age at first gender identity-related diagnosis. Other race/ethnicity includes Black, Asian, and Alaskan Native/American Indian populations. Years enrollment is reported as median (IQR), while all other values are N (%).



**Appendix**  
**Change in Gender on Record and Transgender Adults' Mental or Behavioral Health**  
**Yee et al.**

**Appendix Table 5.** Primary Multivariable Modeling Results Including Unknown Sex Assigned at Birth

| Outcomes                      | Assigned female sex at birth |                         | Assigned male sex at birth |                          | Unknown sex assigned at birth |                         |
|-------------------------------|------------------------------|-------------------------|----------------------------|--------------------------|-------------------------------|-------------------------|
|                               | Female gender<br>(N=836)     | Male gender<br>(N=303)  | Male gender<br>(N=898)     | Female gender<br>(N=449) | Female gender<br>(N=166)      | Male gender<br>(N=288)  |
|                               | % (95% CI)                   | % (95% CI)              | % (95% CI)                 | % (95% CI)               | % (95% CI)                    | % (95% CI)              |
| Anxiety                       | 73.72<br>(71.82, 75.52)      | 50.09<br>(45.32, 54.86) | 58.50<br>(55.86, 61.08)    | 47.68<br>(43.56, 51.83)  | 61.61<br>(58.12, 64.98)       | 49.81<br>(46.10, 53.52) |
| Depression                    | 78.10<br>(76.33, 79.78)      | 54.15<br>(49.36, 58.87) | 69.69<br>(67.21, 72.07)    | 59.15<br>(54.98, 63.20)  | 70.88<br>(67.64, 73.91)       | 61.75<br>(58.11, 65.26) |
| Suicide                       | 25.06<br>(23.29, 26.91)      | 9.31<br>(7.10, 12.11)   | 20.43<br>(18.44, 22.57)    | 14.51<br>(12.00, 17.44)  | 22.82<br>(20.07, 25.83)       | 15.64<br>(13.26, 18.35) |
| Posttraumatic stress disorder | 38.17<br>(36.05, 40.33)      | 15.97<br>(13.18, 19.21) | 22.38<br>(20.31, 24.59)    | 18.45<br>(15.76, 21.48)  | 22.88<br>(19.94, 26.10)       | 16.74<br>(14.26, 19.57) |
| Alcohol use disorders         | 6.18<br>(5.25, 7.26)         | 2.42<br>(1.58, 3.68)    | 5.22<br>(4.28, 6.35)       | 2.65<br>(1.86, 3.75)     | 2.42<br>(1.59, 3.68)          | 5.48<br>(4.16, 7.17)    |
| Substance use disorders       | 12.39<br>(11.06, 13.85)      | 4.46<br>(3.17, 6.22)    | 11.90<br>(10.39, 13.59)    | 5.70<br>(4.38, 7.38)     | 6.40<br>(4.89, 8.34)          | 9.19<br>(7.40, 11.36)   |
| Tobacco use disorders         | 15.31<br>(13.72, 17.04)      | 6.09<br>(4.69, 7.87)    | 13.83<br>(12.15, 15.71)    | 5.28<br>(4.15, 6.71)     | 6.20<br>(4.78, 8.02)          | 8.74<br>(7.06, 10.77)   |

*Notes:* Models adjusted for race and ethnicity, residence in Portland metro, age, and years enrolled. Age was calculated as age at time of first diagnosis of the condition, or age at the study midpoint (June 30, 2014) for those without the condition. Years of enrollment was calculated as time from enrollment to first diagnosis of the condition, or as total years of enrollment among those without the condition. Total adult cohort includes unknown sex assigned at birth.

**Appendix**  
**Change in Gender on Record and Transgender Adults' Mental or Behavioral Health**  
**Yee et al.**

**Appendix Table 6.** Sensitivity Analysis 1: Multivariable Modeling Results Using Modified Definition of Change in Gender on Record

| Outcomes                      | Assigned female sex at birth |                         | Assigned male sex at birth |                          | Unknown sex assigned at birth |                         |
|-------------------------------|------------------------------|-------------------------|----------------------------|--------------------------|-------------------------------|-------------------------|
|                               | Female gender<br>(N=655)     | Male gender<br>(N=484)  | Male gender<br>(N=613)     | Female gender<br>(N=734) | Female gender<br>(N=184)      | Male gender<br>(N=270)  |
|                               | % (95% CI)                   | % (95% CI)              | % (95% CI)                 | % (95% CI)               | % (95% CI)                    | % (95% CI)              |
| Anxiety                       | 72.21<br>(68.29, 75.82)      | 62.33<br>(57.45, 86.97) | 54.53<br>(50.08, 58.91)    | 56.82<br>(52.79, 60.76)  | 38.23<br>(31.01, 46.01)       | 41.89<br>(35.63, 48.43) |
| Depression                    | 75.68<br>(71.87, 79.12)      | 65.45<br>(60.57, 70.04) | 68.72<br>(64.47, 72.68)    | 69.55<br>(65.68, 73.17)  | 49.22<br>(41.29, 57.18)       | 54.85<br>(48.18, 61.35) |
| Suicide                       | 12.09<br>(9.73, 14.94)       | 9.21<br>(6.99, 12.04)   | 13.40<br>(10.89, 16.38)    | 13.76<br>(11.42, 16.49)  | 5.15<br>(3.14, 8.33)          | 8.27<br>(5.83, 11.60)   |
| Posttraumatic stress disorder | 39.50<br>(35.36, 43.80)      | 27.10<br>(23.06, 31.56) | 20.78<br>(17.56, 24.42)    | 26.28<br>(22.99, 29.87)  | 12.08<br>(8.43, 17.01)        | 15.29<br>(11.61, 19.86) |
| Alcohol use disorders         | 8.83<br>(6.83, 11.36)        | 5.94<br>(4.23, 8.26)    | 6.76<br>(5.10, 8.90)       | 5.52<br>(4.16, 7.29)     | 3.06<br>(1.62, 5.70)          | 6.86<br>(4.68, 9.95)    |
| Substance use disorders       | 15.12<br>(12.44, 18.25)      | 8.90<br>(6.70, 11.73)   | 14.14<br>(11.59, 17.14)    | 11.56<br>(9.45, 14.06)   | 7.43<br>(4.76, 11.43)         | 11.08<br>(8.11, 14.96)  |
| Tobacco use disorders         | 19.44<br>(16.11, 23.28)      | 12.90<br>(10.10, 16.34) | 17.35<br>(14.23, 21.00)    | 11.97<br>(9.68, 14.72)   | 8.49<br>(5.79, 12.29)         | 10.43<br>(7.62, 14.10)  |

*Notes:* Whereas the primary results defined self-reported gender using the gender reported at initial enrollment, this analysis used a modified definition of gender as an enrolled gender that differed from sex assigned at birth at any time during the study period. Models adjusted for race and ethnicity, residence in Portland metro, age, and years enrolled. Age was calculated as age at time of first diagnosis of the condition, or age at the study midpoint (June 30, 2014) for those without the condition. Years of enrollment was calculated as time from enrollment to first diagnosis of the condition, or as total years of enrollment among those without the condition.

**Appendix**  
**Change in Gender on Record and Transgender Adults' Mental or Behavioral Health**  
**Yee et al.**

**Appendix Figure 1.** Application of alternative method (Jasuja 2020) for identifying transgender and nonbinary beneficiaries in administrative claims.

Tier 1 Entry Criteria  
 Gender Identity Disorder

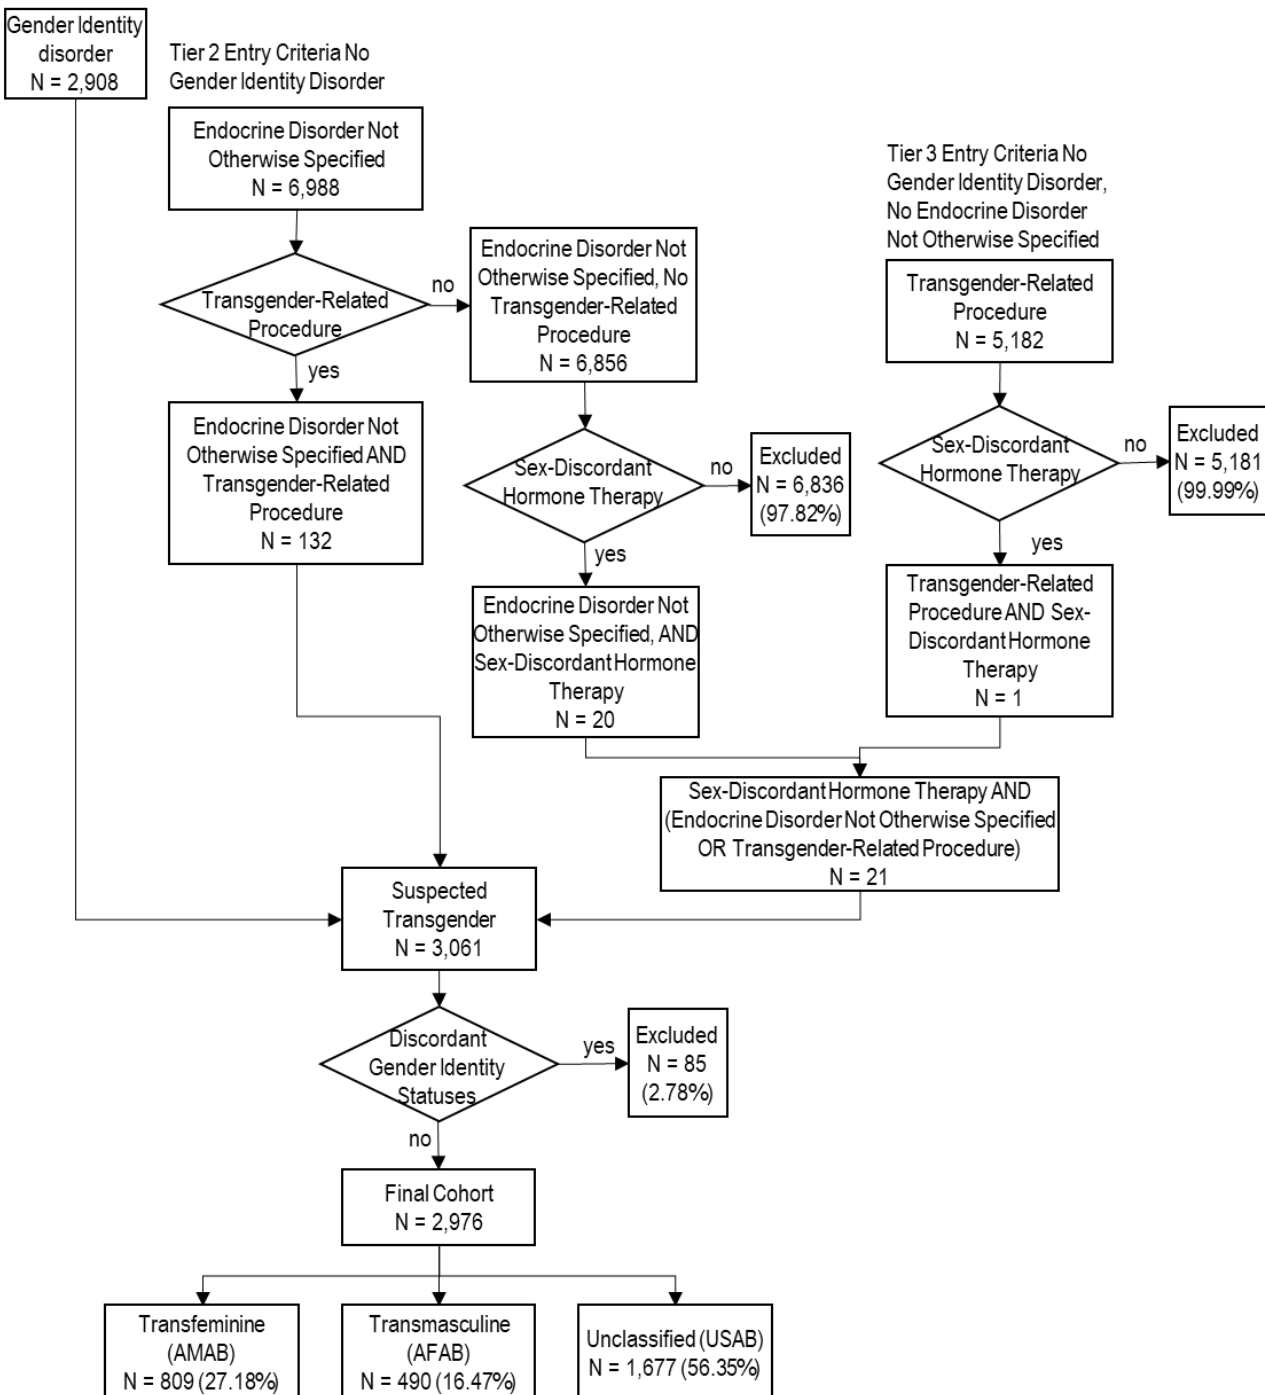

*Note:* Figure reproduced from Jasuja et al., *Medical Care* 2020, although numbers reflect the algorithm results from 2010–2019 Oregon Medicaid beneficiaries.

AFAB, assigned female sex at birth; AMAB, assigned male sex at birth; USAB, unknown sex assigned at birth.

**Appendix**  
**Change in Gender on Record and Transgender Adults' Mental or Behavioral Health**  
**Yee et al.**

**Appendix Table 7.** Comparison of Sex Assigned at Birth Inference in Present Study to Alternative Method (Jasuja 2020)

| <b>Category in Yee et. al. method:</b> | <b>Category in Jasuja et. al. method:</b> |                             |                            |                                |
|----------------------------------------|-------------------------------------------|-----------------------------|----------------------------|--------------------------------|
|                                        | <b>Transmasculine (AFAB)</b>              | <b>Transfeminine (AMAB)</b> | <b>Unclassified (USAB)</b> | <b>Individual not included</b> |
| AFAB                                   | 329                                       | 25                          | 762                        | 23                             |
| AMAB                                   | 5                                         | 745                         | 513                        | 84                             |
| USAB                                   | 22                                        | 22                          | 397                        | 13                             |
| Individual not included                | 134                                       | 17                          | 5                          | –                              |

AFAB, assigned female sex at birth; AMAB, assigned male sex at birth; USAB, unknown sex assigned at birth.

**Appendix**  
**Change in Gender on Record and Transgender Adults' Mental or Behavioral Health**  
**Yee et al.**

**Appendix Table 8.** Sensitivity Analysis 2: Multivariable Modeling Results Using Alternative Method (Jasuja 2020) of Inferring Sex Assigned at Birth

| Outcomes                      | Assigned female sex at birth |                         | Assigned male sex at birth |                         | Unknown sex assigned at birth |                         |
|-------------------------------|------------------------------|-------------------------|----------------------------|-------------------------|-------------------------------|-------------------------|
|                               | Female gender<br>(N=472)     | Male gender<br>(N=69)   | Male gender<br>(N=740)     | Female gender<br>(N=18) | Female gender<br>(N=989)      | Male gender<br>(N=688)  |
|                               | % (95% CI)                   | % (95% CI)              | % (95% CI)                 | % (95% CI)              | % (95% CI)                    | % (95% CI)              |
| Anxiety                       | 79.02<br>(74.84, 82.66)      | 76.42<br>(63.96, 85.55) | 60.17<br>(56.18, 64.02)    | 60.01<br>(33.18, 81.93) | 53.46<br>(49.97, 56.91)       | 49.10<br>(44.96, 53.26) |
| Depression                    | 82.84<br>(78.93, 86.15)      | 77.98<br>(65.07, 87.06) | 73.19<br>(69.55, 76.55)    | 74.09<br>(45.50, 90.73) | 63.27<br>(59.80, 66.60)       | 59.84<br>(55.65, 63.89) |
| Suicide                       | 15.54<br>(12.22, 19.56)      | 13.84<br>(7.37, 24.48)  | 14.81<br>(12.36, 17.66)    | 4.68<br>(0.63, 27.58)   | 8.72<br>(7.14, 10.61)         | 8.15<br>(6.44, 10.26)   |
| Posttraumatic stress disorder | 44.13<br>(38.95, 49.43)      | 46.90<br>(33.73, 60.50) | 25.08<br>(21.83, 28.64)    | 19.72<br>(6.92, 44.80)  | 24.22<br>(21.46, 27.21)       | 15.98<br>(13.42, 18.92) |
| Alcohol use disorders         | 10.95<br>(8.19, 14.48)       | 9.78<br>(4.80, 18.91)   | 7.39<br>(5.75, 9.45)       | 7.24<br>(1.67, 26.34)   | 4.66<br>(3.57, 6.06)          | 5.79<br>(4.39, 7.60)    |
| Substance use disorders       | 23.28<br>(19.28, 27.83)      | 14.22<br>(7.66, 24.90)  | 14.99<br>(12.55, 17.81)    | 16.47<br>(5.85, 38.50)  | 9.19<br>(7.56, 11.12)         | 9.64<br>(7.75, 11.94)   |
| Tobacco use disorders         | 31.21<br>(25.97, 36.98)      | 21.40<br>(12.13, 34.96) | 19.78<br>(16.58, 23.42)    | 14.57<br>(3.99, 41.17)  | 9.77<br>(8.01, 11.86)         | 11.88<br>(9.63, 14.56)  |

*Notes:* Models adjusted for race and ethnicity, residence in Portland metro, age, and years enrolled. Age was calculated as age at time of first diagnosis of the condition, or age at the study midpoint (June 30, 2014) for those without the condition. Years of enrollment was calculated as time from enrollment to first diagnosis of the condition, or as total years of enrollment among those without the condition.
